1 **Omicron escapes the majority of existing SARS-CoV-2 neutralizing antibodies**

2

3 Yunlong Cao<sup>1,2,#,\*</sup>, Jing Wang<sup>1,3,#</sup>, Fanchong Jian<sup>1,4,#</sup>, Tianhe Xiao<sup>1,5,#</sup>, Weiliang  
4 Song<sup>1,3,#</sup>, Ayijiang Yisimayi<sup>1,3,#</sup>, Weijin Huang<sup>6,#</sup>, Qianqian Li<sup>6</sup>, Peng Wang<sup>1</sup>, Ran An<sup>1</sup>,  
5 Jing Wang<sup>1</sup>, Yao Wang<sup>1</sup>, Xiao Niu<sup>1,4</sup>, Sijie Yang<sup>1,7</sup>, Hui Liang<sup>1</sup>, Haiyan Sun<sup>1</sup>, Tao Li<sup>6</sup>,  
6 Yuanling Yu<sup>6</sup>, Qianqian Cui<sup>6</sup>, Shuo Liu<sup>6</sup>, Xiaodong Yang<sup>8</sup>, Shuo Du<sup>3</sup>, Zhiying Zhang<sup>3</sup>,  
7 Xiaohua Hao<sup>9</sup>, Fei Shao<sup>1</sup>, Ronghua Jin<sup>9</sup>, Xiangxi Wang<sup>10,\*</sup>, Junyu Xiao<sup>2,3,\*</sup>, Youchun  
8 Wang<sup>6,\*</sup>, Xiaoliang Sunney Xie<sup>1,2,\*</sup>

9

10 <sup>1</sup>Biomedical Pioneering Innovation Center (BIOPIC), Peking University, Beijing, P.R.  
11 China.

12 <sup>2</sup>Beijing Advanced Innovation Center for Genomics (ICG), Peking University, Beijing,  
13 P.R. China.

14 <sup>3</sup>School of Life Sciences, Peking University, Beijing, P.R. China.

15 <sup>4</sup>College of Chemistry and Molecular Engineering, Peking University, Beijing, P.R.  
16 China.

17 <sup>5</sup>Joint Graduate Program of Peking-Tsinghua-NIBS, Academy for Advanced  
18 Interdisciplinary Studies, Peking University, Beijing, China.

19 <sup>6</sup>Division of HIV/AIDS and Sex-transmitted Virus Vaccines, Institute for Biological  
20 Product Control, National Institutes for Food and Drug Control (NIFDC), Beijing, P.R.  
21 China.

22 <sup>7</sup>Tsinghua-Peking Center for Life Sciences, Beijing, P.R. China.

23 <sup>8</sup>Beijing YouAn Hospital, Capital Medical University, Beijing, P.R. China.

24 <sup>9</sup>Beijing Ditan Hospital, Capital Medical University, Beijing, P.R. China.

25 <sup>10</sup>CAS Key Laboratory of Infection and Immunity, National Laboratory of  
26 Macromolecules, Institute of Biophysics, Chinese Academy of Sciences, Beijing, P.R.  
27 China.

28 \*Correspondence: Yunlong Cao (yunlongcao@pku.edu.cn); Junyu Xiao  
29 (junyuxiao@pku.edu.cn); Xiangxi Wang (xiangxi@ibp.ac.cn); Youchun Wang  
30 (wangyc@nifdc.org.cn); Xiaoliang Sunney Xie (sunneyxie@biopic.pku.edu.cn)

31 #These authors contributed equally.

32

33

34 **Abstract**

35 The SARS-CoV-2 B.1.1.529 variant (Omicron) contains 15 mutations on the receptor-  
36 binding domain (RBD). How Omicron would evade RBD neutralizing antibodies  
37 (NAbs) requires immediate investigation. Here, we used high-throughput yeast display  
38 screening<sup>1,2</sup> to determine the RBD escaping mutation profiles for 247 human anti-RBD  
39 NAbs and showed that the NAbs could be unsupervised clustered into six epitope  
40 groups (A-F), which is highly concordant with knowledge-based structural  
41 classifications<sup>3-5</sup>. Strikingly, various single mutations of Omicron could impair NAbs  
42 of different epitope groups. Specifically, NAbs in Group A-D, whose epitope overlap  
43 with ACE2-binding motif, are largely escaped by K417N, G446S, E484A, and Q493R.  
44 Group E (S309 site)<sup>6</sup> and F (CR3022 site)<sup>7</sup> NAbs, which often exhibit broad  
45 sarbecovirus neutralizing activity, are less affected by Omicron, but still, a subset of  
46 NAbs are escaped by G339D, N440K, and S371L. Furthermore, Omicron pseudovirus  
47 neutralization showed that single mutation tolerating NAbs could also be escaped due  
48 to multiple synergetic mutations on their epitopes. In total, over 85% of the tested NAbs  
49 are escaped by Omicron. Regarding NAb drugs, the neutralization potency of LY-  
50 CoV016/LY-CoV555, REGN10933/REGN10987, AZD1061/AZD8895, and BRII-  
51 196 were greatly reduced by Omicron, while VIR-7831 and DXP-604 still function at  
52 reduced efficacy. Together, data suggest Omicron would cause significant humoral  
53 immune evasion, while NAbs targeting the sarbecovirus conserved region remain most  
54 effective. Our results offer instructions for developing NAb drugs and vaccines against  
55 Omicron and future variants.

56

57 **Main**

58

59 The severe acute respiratory syndrome coronavirus 2 (SARS-CoV-2) variant B.1.1.529  
60 was first reported to the World Health Organization (WHO) on 24 November 2021. It  
61 appears to be rapidly spreading, and the WHO classified it as a variant of concern  
62 (VOC) only two days after, designating it as Omicron<sup>8,9</sup>. An unusually large number  
63 of mutations are found in Omicron, including over 30 in the spike protein (Extended  
64 Data Fig. 1a). The receptor-binding domain, responsible for interacting with the  
65 Angiotensin-Converting Enzyme 2 (ACE2) receptor, bears 15 of these mutations,  
66 including G339D, S371L, S373P, S375F, K417N, N440K, G446S, S477N, T478K,  
67 E484A, Q493R, G496S, Q498R, N501Y, and Y505H. Some of these mutations are  
68 very concerning due to their well-understood functional consequences, such as K417N  
69 and N501Y, which contribute to immune escape and higher infectivity<sup>10-13</sup>. Many other  
70 mutations' functional impacts remain to be investigated.

71

72 The S protein is the target of essentially all NAbs found in the convalescent sera or  
73 elicited by vaccines. Most of the N-terminal domain (NTD) neutralizing antibodies  
74 target an antigenic “supersite” in NTD, involving the N3 (residues 141 to 156) and N5  
75 (residues 246 to 260) loops<sup>14,15</sup>, and are thus very prone to NTD mutations. Omicron  
76 carries the Δ143-145 mutation, which would alter the N3 loop and most likely result in  
77 immune escape of most anti-NTD NAbs (Extended Data Fig. 1b). Compared to NTD  
78 targeting NAbs, RBD targeting NAbs are particularly abundant and potent, and display  
79 diverse epitopes. Evaluating how Omicron affects the neutralization capability of anti-  
80 RBD NAbs of diverse classes and epitopes is urgently needed.

81

82 RBD-directed SARS-CoV-2 NAbs can be assigned into different classes or binding  
83 sites based on structural analyses by cryo-EM or high-resolution crystallography<sup>3-5</sup>;  
84 however, structural data only indicates the contacting amino acids, but does not infer  
85 the escaping mutations for a specific antibody. Recent advances in deep antigen  
86 mutation screening using FACS (fluorescence-activated cell sorting)-based yeast  
87 display platform has allowed the quick mapping of all single amino acid mutations in  
88 the RBD that affect the binding of SARS-CoV-2 RBD NAbs<sup>1,16</sup>. The method has  
89 proven highly effective in predicting NAB drug efficacy toward mutations<sup>2</sup>. However,  
90 to study how human humoral immunity may react to highly mutated variants like

91 Omicron requires mutation profiling of a large collection of NAb targeting different  
92 regions of RBD, and FACS-based yeast display mutation screening is limited by low  
93 experimental throughput. Here we further developed a MACS (magnetic-activated cell  
94 sorting) -based screening method which increases the throughput near 100-fold and  
95 could obtain comparable data quality like FACS (Fig 1a, Extended Data Fig. 2). Using  
96 this method, we quickly characterized the RBD escaping mutation profile for a total of  
97 247 NAb (Supplementary Data 1). Half of the NAb were part of the antibodies  
98 identified by us using single-cell VDJ sequencing of antigen-specific memory B cells  
99 from SARS-CoV-2 convalescents, SARS-CoV-2 vaccinees, and SARS-CoV-1  
100 convalescents who recently received SARS-CoV-2 vaccines (Supplementary Data 2).  
101 The other half of NAb were identified by groups worldwide<sup>3,5,6,11,17-40</sup> (Supplementary  
102 Table 1).

103

104 The high-throughput screening capability allowed us to classify these NAb into six  
105 Epitope Groups (A-F) using unsupervised clustering without dependence on structural  
106 studies, and the grouping is highly concordant with the knowledge-based structural  
107 classifications<sup>3-5</sup> (Fig. 1b, c). In particular, Group A-D NAb largely correspond to the  
108 RBS A-D NAb described by Yuan et al.<sup>4</sup> and overlap with the class 1-2 NAb  
109 described by Barnes et al.<sup>3</sup> in general. The epitopes of these NAb largely overlap with  
110 RBD residues involved in the binding to ACE2. Group A and B NAb, represented by  
111 LY-CoV016 and AZD8895, respectively, usually can only bind to the 'up' RBD;  
112 whereas most of the Group C and D members, such as LY-CoV555 and REGN-10987,  
113 bind to RBDs regardless of their 'up' and 'down' conformations. Group E and F NAb  
114 are very similar to the class 3 and 4 NAb described by Barnes et al.<sup>3</sup> and target the  
115 S309/VIR-7831 site and CR3022 site, which could exhibit pan-sarbecovirus  
116 neutralization capacity (Fig 1e). Most of these NAb neutralize SARS-CoV-2 using  
117 mechanisms other than directly interfering with ACE2 binding.

118

119 Inferred from the escaping mutation profiles, various single mutations of Omicron  
120 could impair NAb of different epitope groups (Extended Data Fig. 3). Specifically,  
121 NAb in Group A-D, whose epitope overlaps with ACE2-binding motif, are largely  
122 escaped by single mutations of K417N, G446S, E484A, and Q493R. Also, a subset of  
123 NAb of Group E and F are escaped by single mutations of G339D, N440K, S371L,  
124 S375F. However, due to the extensive mutations accumulated on Omicron's RBD,

125 studying NAb's response to Omicron only in the single mutation context is insufficient.  
126 Indeed, Omicron pseudovirus neutralization and spike enzyme-linked immunosorbent  
127 assay (ELISA) showed that single mutation tolerating NABs could also be escaped by  
128 Omicron due to multiple synergetic mutations on their epitopes (Fig 1d, Extended Data  
129 Fig. 3). In total, over 85% of the tested human NABs are escaped, suggesting that  
130 Omicron could cause significant humoral immune evasion and potential antigenic  
131 shifting.

132

133 It is crucial to analyze how each group of NABs reacts to Omicron to instruct the  
134 development of NAb drugs and vaccines. Group A NABs mainly contains the *VH3-*  
135 *53/VH3-66* germline gene-encoded antibodies, which are abundantly present in our  
136 current collection of SARS-CoV-2 neutralizing antibodies<sup>17,21,22,26,41-43</sup>, including  
137 several antibodies that have obtained emergency use authorization (CB6/LY-CoV016)  
138<sup>19</sup> or are currently being studied in clinical trials (P2C-1F11/BRII-196, BD-604/DXP-  
139 604)<sup>18,44</sup> (Fig. 2a, Extended Data Fig. 4a). Group A NABs often exhibit less somatic  
140 mutations and shorter CDR3 length compared to other groups (Extended Data Fig. 5a,  
141 b). The epitopes of these antibodies extensively overlap with the binding site of ACE2  
142 and are often evaded by RBD mutations on K417, D420, F456, A475, L455 sites (Fig  
143 2d, Extended Data Fig. 6a,7a). Most NABs in Group A were already escaped by B.1.351  
144 (Beta) strain (Extended Data Fig. 5d), specifically by K417N (Extended Data Fig. 8a),  
145 due to a critical salt bridge interaction between Lys417 and a negatively charged residue  
146 in the antibody (Fig. 2g). The NABs that survived Beta strain, such as BRII-196 and  
147 DXP-604, are insensitive to the K417N single site change but could also be heavily  
148 affected by the combination of K417N and other RBD mutations located on their  
149 epitopes, like S477N, Q493R, G496S, Q498R, N501Y, and Y505H of Omicron,  
150 causing lost or reduction of neutralization (Fig 2d; Extended Data Fig. 7a).

151

152 The *VH1-58* gene-encoded NABs are enriched in Group B (Extended Data Fig. 4b).  
153 These NABs such as AZD8895<sup>36</sup>, REGN-10933<sup>42</sup>, and BD-836<sup>45</sup> bind to the left  
154 shoulder of RBD, often focusing on the far tip (Fig. 2h). These NABs are very sensitive  
155 to the change of F486, N487, and G476 (Fig 2b, Extended Data Fig. 6b). Fortunately,  
156 F486 and a few other major targeting sites of these NABs are critically involved in  
157 ACE2-binding, and therefore they are generally harder to be escaped. A subset of NABs  
158 in Group B, such as AZD8895 and BD-836, could survive Beta (Fig 2e); however,

159 Omicron significantly reduced Group B NAbs' binding affinity to RBD, potentially  
160 through S477N/T478K/E484A on their epitope (Extended Data Fig. 7b)<sup>46</sup>, resulting in  
161 the loss of neutralization.

162

163 Group C NAbs are frequently encoded by *VH1-2* and *VH1-69* (Extended Data Fig. 4c).  
164 The majority of NAbs in this group could bind to both “up” and “down” RBDs,  
165 resulting in higher neutralization potency compared to other groups (Fig. 2c, Extended  
166 Data Fig. 5c). Several highly potent antibodies are found in Group C, including BD-  
167 368-2/DXP-593<sup>44</sup>, C002<sup>3</sup>, and LY-CoV555<sup>47</sup>. They bind to the right shoulder of RBD  
168 (Fig. 2i), and are mostly prone to the change of E484 (Extended Data Fig. 6c, 7c), such  
169 as the E484K mutation found in Beta (Fig. 2f). The E484A mutation seen in Omicron  
170 elicited a similar escaping effect, although the change to Ala is slightly subtler, and  
171 could be tolerated by certain antibodies in this group (Extended Data Fig. 8b). All  
172 Group C NAbs tested are escaped by Omicron.

173

174 Group D NAbs consist of diverse IGHV gene-encoded antibodies (Extended Data Fig.  
175 4d). Prominent members in this group include REGN-10987<sup>42</sup> and AZD1061<sup>36</sup> (Fig.  
176 3a). They further rotate down from the RBD right shoulder towards the S309 site when  
177 compared to Group C NAbs (Fig. 3g). As a loop formed by residues 440-449 in RBD  
178 is critical for the targeting of this group of NAbs, they are sensitive to the changes of  
179 N440, K444, G446, and N448 (Extended Data Fig. 6d, 7d). Most NAbs of Group D  
180 remain active against Beta; however, G446S would substantially affect their  
181 neutralization capability against Omicron (Fig. 3d). Also, for those NAbs that could  
182 tolerate G446S single mutation, the N440K/G446S combination may significantly  
183 reduce their binding affinity, resulting in that most Group D NAbs are escaped by  
184 Omicron.

185

186 Group E and F NAbs are rarer when compared to the other four groups. The  
187 archetypical member of each group was originally isolated from a SARS-CoV-1  
188 convalescent, and displays SARS-CoV-2 cross-neutralizing activity. There is no clear  
189 VDJ convergent effect compared to Group A, B, and C (Extended Data Fig. 4e, f), and  
190 the mutation rate and CDR3 length are larger than other groups. NAbs in Group E and  
191 F rarely compete with ACE2; thus, their average half-maximal inhibitory concentration  
192 (IC<sub>50</sub>) is higher than NAbs in Group A-D (Extended Data Fig. 5c). NAbs in Group E,

193 such as VIR-7831/S309, may recognize a mixed protein/carbohydrate epitope,  
194 involving the N-linked glycan on N343 <sup>6</sup> (Fig. 3h). Inferred from the escaping mutation  
195 profiles (Fig. 3b), Group E NAbs are often sensitive to changes of G339, T345, and  
196 R346 (Extended Data Fig 6e, 7e). The G339D mutation would affect a subset of NAbs'  
197 neutralization performance (Fig. 3e). Also, part of Group E NAbs' epitope would  
198 extend to the 440-449 loop, making them sensitive to N440K in Omicron (Fig. 3e).  
199 Noticeably, the population of Omicron with R346K is continuously increasing, which  
200 may severely affect the neutralization capacity of Group E NAbs.

201

202 Group F NAbs such as S304 target a cryptic site in RBD that is generally not exposed  
203 (Fig. 3i), therefore their neutralizing activities are generally weaker <sup>7</sup>. Group F NAbs  
204 are often sensitive to changes of F374, T376, and K378 (Extended Data Fig. 6f, 7f). A  
205 loop involving RBD residues 371-375 lies in the ridge between the E and F sites;  
206 therefore, a subset of Group F NAbs, including some Group E NAbs, could be affected  
207 by the S371L/S373P/S375F mutations if their epitopes extend to this region (Fig. 3c,  
208 f). Interestingly, a part of Group F NAbs is highly sensitive to V503 and G504, similar  
209 to the epitopes of S2X259 (Fig. 3f, j), suggesting that they can compete with ACE2.  
210 Indeed, several NAbs, such as BD55-5300 and BD55-3372, exhibit higher  
211 neutralization potency than other NAbs in Group F (Fig. 3c, 4b). However, These  
212 antibodies' neutralization capability might be undermined by N501Y and Y505H of  
213 Omicron (Fig. 3j).

214

215 As for NAb drugs, consistent with their escaping mutation profiles, the neutralization  
216 potency of LY-CoV016/LY-CoV555, REGN-10933/REGN-10987, and AZD1061 are  
217 greatly reduced by Omicron (Fig. 4a, Extended Data Fig. 9). The binding affinity of  
218 AZD8895 and BRII-196 toward Omicron RBD is also significantly reduced, likely due  
219 to multiple mutations accumulating on their epitopes, such that AZD8895 and BRII-  
220 196 failed to neutralize Omicron (Extended Data Fig. 10). BRII-198 was not tested  
221 since the antibody sequence was not released. VIR-7831 retains strong RBD binding  
222 capability, although G339 is part of its epitope, the G339D mutation in Omicron does  
223 not appear to affect VIR-7831's binding; however, VIR-7831's IC<sub>50</sub> is reduced to 181  
224 ng/mL, and may be subject to further reduction against Omicron with R346K. DXP-  
225 604's binding affinity against Omicron RBD is largely reduced compared to wildtype  
226 RBD; nevertheless, it can still neutralize Omicron at an IC<sub>50</sub> of 287 ng/mL, a nearly

227 30-fold reduction compared to wildtype (Fig. 4a). Additionally, several NABs in Group  
228 E and F have shown high potency against Omicron and broad pan-sarbecovirus  
229 neutralization ability, promising for NAb drug development (Fig. 4b). Many more  
230 NABs identified from vaccinated SARS-CoV-1 convalescents are waiting to be  
231 characterized.

232

233 The high-throughput yeast screening method provides a laboratory means for quickly  
234 examining the epitope of a certain NAB; however, the current throughput using FACS  
235 is limited and can not be used to evaluate a large NAB library. By virtue of MACS, we  
236 are able to increase the throughput by two orders of magnitude. In doing so, we were  
237 able to gain statistical confidence for the survival proportion of anti-RBD NABs in each  
238 epitope group against Omicron. The experimental accuracy for predicting the  
239 neutralization reduction for single amino acid mutations is relatively high (Extended  
240 Data Fig. 8a, b); however, current mutation screening through yeast display could not  
241 effectively probe the consequence of multiple mutations simultaneously, which  
242 requires further technical optimization.

243

244 To date, a large number of SARS-CoV-2 anti-RBD NABs have been identified from  
245 convalescents and vaccinees. The most potent NABs are frequently found in Groups A-  
246 D as we described above, which tend to directly interfere with the binding of ACE2.  
247 Nevertheless, the neutralizing powers of these NABs are often abrogated by RBD  
248 mutations in the evolutionary arms race between SARS-CoV-2 and human humoral  
249 immunity. Indeed, we showed that Omicron would escape the majority of SARS-CoV-  
250 2 NABs in this collection (Extended Data Fig. 5e). On the other hand, Groups E and F  
251 NABs are less affected by Omicron, likely because they are not abundant in population  
252 <sup>48</sup>, hence exerting less evolutionary pressure for RBD to mutate in the corresponding  
253 epitope groups. These NABs target conserved RBD regions in sarbecovirus and  
254 therefore are ideal targets for future development of pan-sarbecovirus NAb drugs.

255

## 256 **References**

- 257 1 Starr, T. N. *et al.* Prospective mapping of viral mutations that escape  
258 antibodies used to treat COVID-19. *Science* **371**, 850-854,  
259 doi:10.1126/science.abf9302 (2021).  
260 2 Starr, T. N., Greaney, A. J., Dingens, A. S. & Bloom, J. D. Complete map of  
261 SARS-CoV-2 RBD mutations that escape the monoclonal antibody LY-



- 262 CoV555 and its cocktail with LY-CoV016. *Cell Rep Med* **2**, 100255,  
263 doi:10.1016/j.xcrm.2021.100255 (2021).
- 264 3 Barnes, C. O. *et al.* SARS-CoV-2 neutralizing antibody structures inform  
265 therapeutic strategies. *Nature* **588**, 682-687, doi:10.1038/s41586-020-2852-1  
266 (2020).
- 267 4 Yuan, M. *et al.* Structural and functional ramifications of antigenic drift in  
268 recent SARS-CoV-2 variants. *Science* **373**, 818-823,  
269 doi:10.1126/science.abh1139 (2021).
- 270 5 Dejnirattisai, W. *et al.* The antigenic anatomy of SARS-CoV-2 receptor  
271 binding domain. *Cell* **184**, 2183-2200 e2122, doi:10.1016/j.cell.2021.02.032  
272 (2021).
- 273 6 Pinto, D. *et al.* Cross-neutralization of SARS-CoV-2 by a human monoclonal  
274 SARS-CoV antibody. *Nature* **583**, 290-295, doi:10.1038/s41586-020-2349-y  
275 (2020).
- 276 7 Yuan, M. *et al.* A highly conserved cryptic epitope in the receptor binding  
277 domains of SARS-CoV-2 and SARS-CoV. *Science* **368**, 630-633,  
278 doi:10.1126/science.abb7269 (2020).
- 279 8 Callaway, E. Heavily mutated Omicron variant puts scientists on alert. *Nature*  
280 **600**, 21, doi:10.1038/d41586-021-03552-w (2021).
- 281 9 Callaway, E. & Ledford, H. How bad is Omicron? What scientists know so far.  
282 *Nature*, doi:10.1038/d41586-021-03614-z (2021).
- 283 10 Li, Q. *et al.* SARS-CoV-2 501Y.V2 variants lack higher infectivity but do have  
284 immune escape. *Cell* **184**, 2362-2371 e2369, doi:10.1016/j.cell.2021.02.042  
285 (2021).
- 286 11 Cao, Y. *et al.* Humoral immune response to circulating SARS-CoV-2 variants  
287 elicited by inactivated and RBD-subunit vaccines. *Cell Res* **31**, 732-741,  
288 doi:10.1038/s41422-021-00514-9 (2021).
- 289 12 Starr, T. N. *et al.* Deep Mutational Scanning of SARS-CoV-2 Receptor  
290 Binding Domain Reveals Constraints on Folding and ACE2 Binding. *Cell* **182**,  
291 1295-1310 e1220, doi:10.1016/j.cell.2020.08.012 (2020).
- 292 13 Gu, H. *et al.* Adaptation of SARS-CoV-2 in BALB/c mice for testing vaccine  
293 efficacy. *Science* **369**, 1603-1607, doi:10.1126/science.abc4730 (2020).
- 294 14 Cerutti, G. *et al.* Potent SARS-CoV-2 neutralizing antibodies directed against  
295 spike N-terminal domain target a single supersite. *Cell Host Microbe* **29**, 819-  
296 833 e817, doi:10.1016/j.chom.2021.03.005 (2021).
- 297 15 McCallum, M. *et al.* N-terminal domain antigenic mapping reveals a site of  
298 vulnerability for SARS-CoV-2. *Cell* **184**, 2332-2347 e2316,  
299 doi:10.1016/j.cell.2021.03.028 (2021).
- 300 16 Greaney, A. J. *et al.* Complete Mapping of Mutations to the SARS-CoV-2  
301 Spike Receptor-Binding Domain that Escape Antibody Recognition. *Cell Host*  
302 *Microbe* **29**, 44-57 e49, doi:10.1016/j.chom.2020.11.007 (2021).
- 303 17 Cao, Y. *et al.* Potent Neutralizing Antibodies against SARS-CoV-2 Identified  
304 by High-Throughput Single-Cell Sequencing of Convalescent Patients' B  
305 Cells. *Cell* **182**, 73-84 e16, doi:10.1016/j.cell.2020.05.025 (2020).
- 306 18 Ju, B. *et al.* Human neutralizing antibodies elicited by SARS-CoV-2 infection.  
307 *Nature* **584**, 115-119, doi:10.1038/s41586-020-2380-z (2020).
- 308 19 Shi, R. *et al.* A human neutralizing antibody targets the receptor-binding site of  
309 SARS-CoV-2. *Nature* **584**, 120-124, doi:10.1038/s41586-020-2381-y (2020).

- 310 20 Wu, Y. *et al.* A noncompeting pair of human neutralizing antibodies block  
311 COVID-19 virus binding to its receptor ACE2. *Science* **368**, 1274-1278,  
312 doi:10.1126/science.abc2241 (2020).
- 313 21 Yuan, M. *et al.* Structural basis of a shared antibody response to SARS-CoV-2.  
314 *Science* **369**, 1119-1123, doi:10.1126/science.abd2321 (2020).
- 315 22 Robbiani, D. F. *et al.* Convergent antibody responses to SARS-CoV-2 in  
316 convalescent individuals. *Nature* **584**, 437-442, doi:10.1038/s41586-020-  
317 2456-9 (2020).
- 318 23 Liu, L. *et al.* Potent neutralizing antibodies against multiple epitopes on  
319 SARS-CoV-2 spike. *Nature* **584**, 450-456, doi:10.1038/s41586-020-2571-7  
320 (2020).
- 321 24 Baum, A. *et al.* Antibody cocktail to SARS-CoV-2 spike protein prevents rapid  
322 mutational escape seen with individual antibodies. *Science* **369**, 1014-1018,  
323 doi:10.1126/science.abd0831 (2020).
- 324 25 Brouwer, P. J. M. *et al.* Potent neutralizing antibodies from COVID-19  
325 patients define multiple targets of vulnerability. *Science* **369**, 643-650,  
326 doi:10.1126/science.abc5902 (2020).
- 327 26 Rogers, T. F. *et al.* Isolation of potent SARS-CoV-2 neutralizing antibodies  
328 and protection from disease in a small animal model. *Science* **369**, 956-963,  
329 doi:10.1126/science.abc7520 (2020).
- 330 27 Piccoli, L. *et al.* Mapping Neutralizing and Immunodominant Sites on the  
331 SARS-CoV-2 Spike Receptor-Binding Domain by Structure-Guided High-  
332 Resolution Serology. *Cell* **183**, 1024-1042 e1021,  
333 doi:10.1016/j.cell.2020.09.037 (2020).
- 334 28 Zost, S. J. *et al.* Potently neutralizing and protective human antibodies against  
335 SARS-CoV-2. *Nature* **584**, 443-449, doi:10.1038/s41586-020-2548-6 (2020).
- 336 29 Tortorici, M. A. *et al.* Ultrapotent human antibodies protect against SARS-  
337 CoV-2 challenge via multiple mechanisms. *Science* **370**, 950-957,  
338 doi:10.1126/science.abe3354 (2020).
- 339 30 Lv, Z. *et al.* Structural basis for neutralization of SARS-CoV-2 and SARS-  
340 CoV by a potent therapeutic antibody. *Science* **369**, 1505-1509,  
341 doi:10.1126/science.abc5881 (2020).
- 342 31 Zost, S. J. *et al.* Rapid isolation and profiling of a diverse panel of human  
343 monoclonal antibodies targeting the SARS-CoV-2 spike protein. *Nat Med* **26**,  
344 1422-1427, doi:10.1038/s41591-020-0998-x (2020).
- 345 32 Seydoux, E. *et al.* Analysis of a SARS-CoV-2-Infected Individual Reveals  
346 Development of Potent Neutralizing Antibodies with Limited Somatic  
347 Mutation. *Immunity* **53**, 98-105 e105, doi:10.1016/j.immuni.2020.06.001  
348 (2020).
- 349 33 Kreye, J. *et al.* A Therapeutic Non-self-reactive SARS-CoV-2 Antibody  
350 Protects from Lung Pathology in a COVID-19 Hamster Model. *Cell* **183**,  
351 1058-1069 e1019, doi:10.1016/j.cell.2020.09.049 (2020).
- 352 34 Scheid, J. F. *et al.* B cell genomics behind cross-neutralization of SARS-CoV-  
353 2 variants and SARS-CoV. *Cell* **184**, 3205-3221 e3224,  
354 doi:10.1016/j.cell.2021.04.032 (2021).
- 355 35 Tortorici, M. A. *et al.* Broad sarbecovirus neutralization by a human  
356 monoclonal antibody. *Nature* **597**, 103-108, doi:10.1038/s41586-021-03817-4  
357 (2021).

- 358 36 Dong, J. *et al.* Genetic and structural basis for SARS-CoV-2 variant  
359 neutralization by a two-antibody cocktail. *Nat Microbiol* **6**, 1233-1244,  
360 doi:10.1038/s41564-021-00972-2 (2021).
- 361 37 Starr, T. N. *et al.* SARS-CoV-2 RBD antibodies that maximize breadth and  
362 resistance to escape. *Nature* **597**, 97-102, doi:10.1038/s41586-021-03807-6  
363 (2021).
- 364 38 Martinez, D. R. *et al.* A broadly cross-reactive antibody neutralizes and  
365 protects against sarbecovirus challenge in mice. *Sci Transl Med*, eabj7125,  
366 doi:10.1126/scitranslmed.abj7125 (2021).
- 367 39 Onodera, T. *et al.* A SARS-CoV-2 antibody broadly neutralizes SARS-related  
368 coronaviruses and variants by coordinated recognition of a virus-vulnerable  
369 site. *Immunity* **54**, 2385-2398 e2310, doi:10.1016/j.immuni.2021.08.025  
370 (2021).
- 371 40 Raybould, M. I. J., Kovaltsuk, A., Marks, C. & Deane, C. M. CoV-AbDab: the  
372 coronavirus antibody database. *Bioinformatics* **37**, 734-735,  
373 doi:10.1093/bioinformatics/btaa739 (2021).
- 374 41 Barnes, C. O. *et al.* Structures of Human Antibodies Bound to SARS-CoV-2  
375 Spike Reveal Common Epitopes and Recurrent Features of Antibodies. *Cell*  
376 **182**, 828-842 e816, doi:10.1016/j.cell.2020.06.025 (2020).
- 377 42 Hansen, J. *et al.* Studies in humanized mice and convalescent humans yield a  
378 SARS-CoV-2 antibody cocktail. *Science* **369**, 1010-1014,  
379 doi:10.1126/science.abd0827 (2020).
- 380 43 Kim, S. I. *et al.* Stereotypic Neutralizing VH Clonotypes Against SARS-CoV-  
381 2 RBD in COVID-19 Patients and the Healthy Population. *bioRxiv*,  
382 2020.2006.2026.174557, doi:10.1101/2020.06.26.174557 (2020).
- 383 44 Du, S. *et al.* Structurally Resolved SARS-CoV-2 Antibody Shows High  
384 Efficacy in Severely Infected Hamsters and Provides a Potent Cocktail Pairing  
385 Strategy. *Cell* **183**, 1013-1023 e1013, doi:10.1016/j.cell.2020.09.035 (2020).
- 386 45 Du, S. *et al.* Structures of SARS-CoV-2 B.1.351 neutralizing antibodies  
387 provide insights into cocktail design against concerning variants. *Cell Res* **31**,  
388 1130-1133, doi:10.1038/s41422-021-00555-0 (2021).
- 389 46 Harvey, W. T. *et al.* SARS-CoV-2 variants, spike mutations and immune  
390 escape. *Nat Rev Microbiol* **19**, 409-424, doi:10.1038/s41579-021-00573-0  
391 (2021).
- 392 47 Jones, B. E. *et al.* The neutralizing antibody, LY-CoV555, protects against  
393 SARS-CoV-2 infection in nonhuman primates. *Sci Transl Med* **13**,  
394 doi:10.1126/scitranslmed.abf1906 (2021).
- 395 48 Tan, C. W. *et al.* Pan-Sarbecovirus Neutralizing Antibodies in BNT162b2-  
396 Immunized SARS-CoV-1 Survivors. *N Engl J Med* **385**, 1401-1406,  
397 doi:10.1056/NEJMoa2108453 (2021).

398  
399  
400 **Figure legends**

401

402 **Fig. 1: Omicron greatly reduces the neutralization potency of NAbs of diverse**  
403 **epitopes.**

404 **a**, Schematic of MACS-based high-throughput yeast display mutation screening. **b**,

405 Representative NAb structures of each epitope group. **c**, t-SNE embedding and  
406 unsupervised clustering of SARS-CoV-2 human NAb structures based on each antibody  
407 escaping mutation profile. A total of 6 epitope groups (Group A-F) could be defined.  
408 **d**, Neutralization of Omicron variant (spike-pseudotyped VSV) by 247 RBD NAb structures.  
409 Shades of red show IC<sub>50</sub> fold change compared with D614G of each NAb. **e**,  
410 Neutralization of SARS-CoV-1 (spike-pseudotyped VSV) by 247 RBD NAb structures. Shades  
411 of red show the IC<sub>50</sub> value ( $\mu\text{g}/\text{mL}$ ) of each NAb. All pseudovirus neutralization assays  
412 are conducted in biological duplicates or triplicates.

413

414 **Fig. 2: The neutralizing abilities of Group A-C NAb structures are mostly abolished by**  
415 **Omicron.**

416 **a-c**, Escaping mutation profiles of representative NAb structures for group A-C, respectively.  
417 For each site, the height of a letter indicates the detected mutation escape score of its  
418 corresponding residue. Sites mutated in Omicron are highlighted. **d-f**, Heatmaps of site  
419 escape scores for NAb structures of epitope group A-C, respectively. ACE2 interface residues  
420 are annotated with red blocks, and mutated sites in Omicron are marked red.  
421 Annotations on the right side of heatmaps represent pseudovirus neutralizing IC<sub>50</sub> fold  
422 change (FC) for Omicron and Beta compared to D614G. **g-i**, Representative structures  
423 of group A-C antibodies in complex with RBD. Residues involved in important contacts  
424 are labeled. Omicron mutations are marked as blue. NAb escaping mutations (Omicron)  
425 inferred from yeast display are labeled with squares.

426

427 **Fig. 3: The majority of Group D-E NAb structures are escaped by Omicron.**

428 **a-c**, Escaping mutation profiles of representative NAb structures for group D-E, respectively.  
429 For each site, the height of a letter indicates the detected mutation escape score of its  
430 corresponding residue. Sites mutated in Omicron are highlighted. **d-f**, Heatmaps of site  
431 escape scores for NAb structures of epitope group D-E, respectively. ACE2 interface residues  
432 are annotated with red blocks, and mutated sites in Omicron are marked red.  
433 Annotations on the right side of heatmaps represent pseudovirus neutralizing IC<sub>50</sub> fold  
434 change (FC) for Omicron and Beta compared to D614G. **g-j**, Representative structures  
435 of group D-E antibodies in complex with RBD. Residues involved in important contacts  
436 are labeled. Omicron mutations are marked as blue. NAb escaping mutations (Omicron)  
437 inferred from yeast display are labeled with squares.

438

439 **Fig. 4: Omicron escapes most NAb drugs.**

440 **a**, Neutralization of SARS-CoV-2 variants of concern (pseudotyped VSV) by 9 NAb  
441 drugs. The pseudovirus neutralization assays for every VOC were performed in  
442 biological triplicates. IC50 labeled is the average of three replicates shown in Extended  
443 Data Fig. 9. **b**, The sarbecovirus neutralization and binding capability of selected potent  
444 Omicron-neutralizing antibodies. Monoclonal antibody HG1K (IgG1 antibody against  
445 Influenza A virus subtype H7N9) was used as the negative control.

446

447 **Methods**

448

449 **Human peripheral blood mononuclear cells isolation**

450 SARS-CoV-2 convalescents, SARS-CoV-1 convalescents, and SARS-CoV-2  
451 vaccinees were recruited on the basis of prior SARS-CoV-2 infection or SARS-CoV-1  
452 infection or SARS-CoV-2 at Beijing Youan and Ditan hospital. Relevant experiments  
453 regarding SARS-CoV-2 convalescents and vaccinees were approved by the Beijing  
454 Youan Hospital Research Ethics Committee (Ethics committee archiving No. LL-2020-  
455 010-K). Relevant experiments regarding SARS-CoV-1 convalescents were approved  
456 by the Beijing Ditan Hospital Capital Medical University (Ethics committee archiving  
457 No. LL-2021-024-02). All participants provided written informed consent for the  
458 collection of information, and that their clinical samples were stored and used for  
459 research. Data generated from the research were agreed to be published. The detailed  
460 information of SARS-CoV-2 convalescents and vaccinees was previously described<sup>11</sup>.  
461 Briefly, short-term convalescents' blood samples were obtained at day 62 on average  
462 after symptoms onset. Long-term convalescents' blood samples were obtained at day  
463 371 on average after symptoms onset. No vaccination was received before blood  
464 collection. SARS-CoV-2 vaccinees' blood samples were obtained 2 weeks after  
465 complete vaccination of ZF2001 (RBD-subunit vaccine). For vaccinated SARS-CoV-  
466 1 convalescents (average age 58, n = 21), all recruited participants were previously  
467 identified for SARS-CoV-1 infection in 2003, and received two-dose vaccination of  
468 CoronaVac and a booster dose of ZF2001 with a 180-day-interval. 20mL of blood  
469 samples of the vaccinated SARS-CoV-1 convalescents were obtained 2 weeks after the  
470 booster shot. Three Healthy vaccinated donor (average age 25) were also included to  
471 serve as negative control for FACS gating. Peripheral Blood Mononuclear Cells  
472 (PBMCs) were separated from whole blood samples based on the detailed protocol

473 described previously<sup>11</sup>. Briefly, blood samples were first diluted with 2% Fetal Bovine  
474 Serum (FBS) (Gibco) in Phosphate Buffer Saline (PBS) (Invitrogen) and subjected to  
475 Ficoll (Cytiva) gradient centrifugation. After red blood cell lysis and washing steps,  
476 PBMCs were resuspended with 2% FBS in PBS for downstream B cell isolation or 10%  
477 Dimethyl sulfoxide (Sigma-Aldrich) in FBS for further preservation.

478

#### 479 **Antigen-specific B cell sorting and sequencing**

480 Starting with freshly isolated or thawed PBMCs, B cells were enriched by positive  
481 selection using a CD19<sup>+</sup> B cell isolation kit according to the manufacturer's  
482 instructions (STEMCELL). The enriched B cells were stained in FACS buffer (1× PBS,  
483 2% FBS, 1 mM EDTA) with the following anti-human antibodies and antigens: For  
484 every 10<sup>6</sup> cells, 3 μL FITC anti-CD19 Antibody (Biolegend, 392508), 3 μL FITC anti-  
485 CD20 Antibody (Biolegend, 302304), 3.5 μL Brilliant Violet 421 anti-CD27 Antibody  
486 (Biolegend, 302824), 3 μL PE/Cyanine7 anti-IgM (Biolegend, 314532), and  
487 fluorophore-labelled Receptor-Binding Domain (RBD) and ovalbumin (Ova) for 30  
488 min on ice. Cells were stained with 5 μL 7-AAD (eBioscience, 00-6993-50) for 10  
489 minutes before sorting. Biotinylated receptor binding domain (RBD) of SARS (Sino  
490 biological, 40634-V27H-B) or SARS-CoV-2 (Sino biological, 40592-V27H-B) were  
491 multimerized with fluorescently labeled Streptavidin (SA) for 1 hour at 4°C. RBD was  
492 mixed with SA-PE (Biolegend, 405204) and SA-APC (Biolegend, 405207) at a 4:1  
493 molar ratio. For every 10<sup>6</sup> cells, 6 ng SA was used to stain. Single CD19 or CD20<sup>+</sup>,  
494 CD27<sup>+</sup>, IgM<sup>-</sup>, Ova<sup>-</sup>, RBD-PE<sup>+</sup>, RBD-APC<sup>+</sup>, live B cells were sorted on an Astrios EQ  
495 (Beckman Coulter) into PBS containing 30% FBS (Supplementary Data 2). FACS  
496 sorting were controlled by Summit 6.0 (Beckman Coulter). FACS data analyses were  
497 done by FlowJo 10.8. Cells obtained after FACS were sent for 5'-mRNA and V(D)J  
498 libraries preparation as previously described<sup>11</sup>, which were further submitted to  
499 Illumina sequencing on a Hiseq 2500 platform, with the 26x91 pair-end reading mode.

500

#### 501 **V(D)J sequence data analysis**

502 The raw FASTQ files were processed by Cell Ranger (version 6.1.1) pipeline using  
503 GRCh38 reference. Sequences were generated using "cellranger multi" or "cellranger  
504 vdj" with default parameters. Antibody sequences were processed by  
505 IMG/DomainGapAlign (version 4.10.2) to obtain the annotations of V(D)J, regions

506 of complementarity determining regions (CDR), and the mutation frequency<sup>49,50</sup>.  
507 Mutation count divided by the length of the V gene peptide is defined as the amino acid  
508 mutation rate of the V gene.

509

### 510 **Recombinant antibody production**

511 Paired immunoglobulin heavy and light chain genes obtained from 10X Genomics  
512 V(D)J sequencing and analysis were submitted to recombinant monoclonal antibody  
513 synthesis. Briefly, heavy and light genes were cloned into expression vectors,  
514 respectively, based on Gibson assembly, and subsequently co-transfected into  
515 HEK293F cells (ThermoFisher, R79007). The secreted monoclonal antibodies from  
516 cultured cells were purified by protein A affinity chromatography. The specificities of  
517 these antibodies were determined by ELISA.

518

### 519 **ELISA**

520 ELISA plates were coated with RBD (SARS-CoV-2 WT, SARS-CoV-2 Omicron,  
521 SARS-CoV-1 RBD, Sino Biological Inc.) at 0.03 µg/mL and 1 µg/mL in PBS at 4°C  
522 overnight. After standard washing and blocking, 100 µL 1µg/mL antibodies were added  
523 to each well. After a 2 h incubation at room temperature, plates were washed and  
524 incubated with 0.08 µg/mL goat anti-human IgG (H+L)/HRP (JACKSON, 109-035-  
525 003) for 1 h incubation at room temperature. Tetramethylbenzidine (TMB) (Solarbio)  
526 was then added, and the reaction was stopped by adding H<sub>2</sub>SO<sub>4</sub>. OD450 was measured  
527 by an ELISA microplate reader. An antibody is defined as ELISA-positive when the  
528 OD450 (1 µg/mL RBD) is three times larger than the negative control, which utilizes  
529 an H7N9 specific human IgG1 antibody (HG1K, Sino Biology Cat #HG1K).

530

### 531 **Pseudovirus neutralization assay**

532 Pseudovirus neutralization assay was performed to evaluate neutralizing ability of  
533 antibodies. The detailed process was previously described by Cao et al.<sup>12</sup>. Briefly,  
534 serially diluted antibodies were first incubated with pseudotyped virus for 1h, and the  
535 mixture was then incubated with Huh-7 cells. After 24h incubation in an incubator at  
536 37°C, cells were collected and lysed with luciferase substrate (PerkinElmer), then  
537 proceeded to luminescence intensity measurement by a microplate reader. IC<sub>50</sub> was

538 determined by a four-parameter non-linear regression model using PRISM (v9.0.1).  
539 Omicron pseudovirus contains the following mutations: A67V, H69del, V70del, T95I,  
540 G142D, V143del, Y144del, Y145del, N211del, L212I, ins214EPE, G339D, S371L,  
541 S373P, S375F, K417N, N440K, G446S, S477N, T478K, E484A, Q493R, G496S,  
542 Q498R, N501Y, Y505H, T547K, D614G, H655Y, N679K, P681H, N764K, D796Y,  
543 N856K, Q954H, N969K, L981F.

544

#### 545 **Biolayer interferometry**

546 Biolayer interferometry assays were conducted on Octet® R8 Protein Analysis System  
547 (Fortebio) following the manufacturer's instruction. Briefly, after baseline calibration,  
548 Protein A biosensors (Fortebio) were immersed with antibodies to capture the antibody,  
549 then sensors were immersed in PBS with 0.05% Tween-20 to the baseline. After  
550 association with different concentrations of RBD of SARS-CoV-2 variants (Omicron  
551 RBD: 40592-V08H85), disassociation was conducted. Data were recorded using Octet  
552 BLI Discovery (12.2) and analyzed using Octet BLI Analysis (12.2).

553

#### 554 **RBD Deep Mutational Scanning Library construction**

555 The yeast-display RBD mutant libraries used here were constructed as described by  
556 Starr et al.,<sup>12</sup> based on the spike receptor-binding domain (RBD) from SARS-CoV-2  
557 (NCBI GenBank: MN908947, residues N331-T531) with the modifications that instead  
558 of 16-neuclotide barcode (N16), a unique 26-neuclotide (N26), barcode was appended  
559 to each RBD variant as an identifier in order to decrease sequencing cost by eliminating  
560 the use of PhiX. Briefly, three rounds of mutagenesis PCR were performed with  
561 designed and synthesized mutagenetic primer pools; in order to solid our conclusion,  
562 we constructed two RBD mutant libraries independently. RBD mutant libraries were  
563 then cloned into pETcon 2649 vector and the assembled products were electroporated  
564 into electrocompetent DH10B cells to enlarge plasmid yield. Plasmid extracted from *E.*  
565 *coli* were transformed into the EBY100 strain of *Saccharomyces cerevisiae* via the  
566 method described by Gietz and Schiestl<sup>51</sup>. Transformed yeast population were screened  
567 on SD-CAA selective plate and further cultured in SD-CAA liquid medium at a large  
568 scale. The resulted yeast libraries were flash frozen by liquid nitrogen and preserved at  
569 -80°C.

570



## 571 **PacBio library preparation, sequencing, and analysis**

572 The correspondence of RBD gene sequence in mutant library and N26 barcode was  
573 obtained by PacBio sequencing. Firstly, the bacterially-extracted plasmid pools were  
574 digested by NotI restriction enzyme and purified by agarose gel electrophoresis, then  
575 proceed to SMRTbell ligation. Four RBD mutant libraries were sequenced in one  
576 SMRT cell on a PacBio Sequel II platform. PacBio SMRT sequencing subreads were  
577 converted to HiFi ccs reads with pbccs, and then processed with a slightly modified  
578 version of the script previously described<sup>12</sup> to generate the barcode-variant dictionary.  
579 To reduce noise, variants containing stop codons or supported by only one ccs read  
580 were removed from the dictionary and ignored during further analysis.

581

## 582 **Magnetic-activated cell sorting (MACS)-based mutation escape profiling**

583 ACE2 binding mutants were sorted based on magnetic beads to eliminate non-  
584 functional RBD variants. Briefly, the biotin binder beads (Thermo Fisher) were washed  
585 and prepared as the manufacturer's instruction and incubated with biotinylated ACE2  
586 protein (Sino Biological Inc.) at room temperature with mild rotation. The ACE2 bound  
587 beads were washed twice and resuspend with 0.1% BSA buffer (PBS supplemented  
588 with 0.1% bovine serum albumin), and ready for ACE2 positive selection. Transformed  
589 yeast library were inoculated into SD-CAA and grown at 30°C with shaking for 16-  
590 18h, then back-diluted into SG-CAA at 23°C with shaking to induce RBD surface  
591 expression. Yeasts were collected and washed twice with 0.1% BSA buffer and  
592 incubated with aforementioned ACE2 bound beads at room temperature for 30min with  
593 mild rotating. Then, the bead-bound cells were washed, resuspend with SD-CAA  
594 media, and grown at 30°C with shaking. After overnight growth, the bead-unbound  
595 yeasts were separated with a magnet and cultured in a large scale. The above ACE2  
596 positive selected yeast libraries were preserved at -80°C in aliquots as a seed bank for  
597 antibody escape mapping.

598

599 One aliquot of ACE2 positive selected RBD library was thawed and inoculated into  
600 SD-CAA, then grown at 30°C with shaking for 16-18h. 120 OD units were back-diluted  
601 into SG-CAA media and induced for RBD surface expression. Two rounds of  
602 sequential negative selection to sort yeast cells that escape Protein A conjugated  
603 antibody binding were performed according to the manufacturer's protocol. Briefly,

604 Protein A magnetic beads (Thermo Fisher) were washed and resuspend in PBST (PBS  
605 with 0.02% Tween-20). Then beads were incubated with neutralizing antibody and  
606 rotated at room temperature for 30min. The antibody-conjugated beads were washed  
607 and resuspend in PBST. Induced yeast libraries were washed and incubated with  
608 antibody-conjugated beads for 30min at room temperature with agitation. The  
609 supernatant was separated and proceed to a second round of negative selection to ensure  
610 full depletion of antibody-binding yeast.

611

612 To eliminate yeast that did not express RBD, MYC-tag based RBD positive selection  
613 was conducted according to the manufacturer's protocol. First, anti-c-Myc magnetic  
614 beads (Thermo Fisher) were washed and resuspend with 1X TBST (TBS with Tween-  
615 20), then the prepared beads were incubated for 30min with the antibody escaping  
616 yeasts after two rounds of negative selection. Yeasts bound by anti-c-Myc magnetic  
617 beads were wash with 1X TBST and grown overnight in SD-CAA to expand yeast  
618 population prior to plasmid extraction.

619

620 Overnight cultures of MACS sorted antibody-escaped and ACE2 preselected yeast  
621 populations were proceed to yeast plasmid extraction kit (Zymo Research). PCRs were  
622 performed to amplify the N26 barcode sequences as previously described<sup>13</sup>. The PCR  
623 products were purified with 0.9X Ampure XP beads (Beckman Coulter) and submitted  
624 to 75bp single-end Illumina Nextseq 500 sequencing.

625

### 626 **Deep mutational scanning data processing**

627

628 Raw single-end Illumina sequencing reads were trimmed and aligned to the reference  
629 barcode-variant dictionary generated as described above to get the count of each variant  
630 with *dms\_variants* Python package (version 0.8.9). For libraries with N26 barcodes, we  
631 slightly modified the *illuminabarcodeparser* class of this package to tolerate one low  
632 sequencing quality base in the barcode region. The escape score of variant X is defined  
633 as  $F \times (n_{X,ab} / N_{ab}) / (n_{X,ref} / N_{ref})$ , where  $n_{X,ab}$  and  $n_{X,ref}$  is the number of detected barcodes  
634 for variant X,  $N_{ab}$  and  $N_{ref}$  are the total number of barcodes in antibody-selected (ab)  
635 library and reference (ref) library respectively as described by Starr et al.<sup>12</sup>. Different  
636 from FACS experiments, as we couldn't measure the number of cells retained after  
637 MACS selection precisely, here F is considered as a scaling factor to transform raw

638 escape fraction ratios to 0-1 range, and is calculated from the first and 99th percentiles  
639 of raw escape fraction ratios. Scores less than the first percentile or larger than the 99th  
640 percentile are considered to be outliers and set to zero or one, respectively. For each  
641 experiment, barcodes detected by <6 reads in the reference library were removed to  
642 reduce the impact of sampling noise, and variants with ACE2 binding below -2.35 or  
643 RBD expression below -1 were removed as previously described<sup>12</sup>. Finally, we built  
644 global epistasis models with *dms\_variants* package for each library to estimate single  
645 mutation escape scores, utilizing the Python scripts provided by Greaney et al.<sup>16</sup>. To  
646 reduce experiment noise, sites are retained for further analysis only if its total escape  
647 score is at least 0.01, and at least 3 times greater than the median score of all sites. For  
648 antibodies measured by 2 independent experiments, only sites which pass the filter in  
649 both experiments are retained. Logo plots in Fig. 2, Fig. 3, Extended Data Fig. 2 and  
650 Supplementary Data 1 are generated by Python package *logomaker* (version 0.8).

651

## 652 **Antibody clustering**

653 Antibody clustering and epitope group identification were performed based on the  
654  $N \times M$  escape score matrix, where  $N$  is the number of antibodies which pass the quality  
655 controlling filters, and  $M$  is the number of informative sites on SARS-CoV-2 RBD.  
656 Each entry of the matrix  $A_{nm}$  refers to the total escape score of all kinds of mutations  
657 on site  $m$  of antibody  $n$ . The dissimilarity between two antibodies is defined based on  
658 the Pearson's correlation coefficient of their escape score vectors, i. e.  $D_{ij} = 1 -$   
659  $\text{Corr}(A_i, A_j)$ , where  $\text{Corr}(A_i, A_j) = \mathbf{x}_i \cdot \mathbf{x}_j / |\mathbf{x}_i| |\mathbf{x}_j|$  and vector  $\mathbf{x}_i = A_i - \text{Mean}(A_i)$ . Sites with at  
660 least 6 escaped antibodies (site escape score  $> 1$ ) were considered informative and  
661 selected for dimensionality reduction and clustering. We utilized R function *cmdscale*  
662 to convert the cleaned escape matrix into an  $N \times 6$  feature matrix by multidimensional  
663 scaling (MDS) with the dissimilarity metric described above, followed by unsupervised  
664 k-medoids clustering within this 6-dimensional antibody feature space, using *pam*  
665 function of R package *cluster* (version 2.1.1). Finally, two-dimensional t-Distributed  
666 Stochastic Neighbor Embedding (tSNE) embeddings were generated with *Rtsne*  
667 package (version 0.15) for visualization. 2D t-SNE plots are generated by *ggplot2*  
668 (version 3.3.3), and heatmaps are generated by *ComplexHeatmap* package (version  
669 2.6.2).

670

671 **Reference**

- 672 49 Ehrenmann, F., Kaas, Q. & Lefranc, M. P. IMGT/3Dstructure-DB and  
673 IMGT/DomainGapAlign: a database and a tool for immunoglobulins or  
674 antibodies, T cell receptors, MHC, IgSF and MhcSF. *Nucleic Acids Res* **38**,  
675 D301-307, doi:10.1093/nar/gkp946 (2010).
- 676 50 Ehrenmann, F. & Lefranc, M. P. IMGT/DomainGapAlign: IMGT standardized  
677 analysis of amino acid sequences of variable, constant, and groove domains  
678 (IG, TR, MH, IgSF, MhSF). *Cold Spring Harb Protoc* **2011**, 737-749,  
679 doi:10.1101/pdb.prot5636 (2011).
- 680 51 Gietz, R. D. & Schiestl, R. H. High-efficiency yeast transformation using the  
681 LiAc/SS carrier DNA/PEG method. *Nat Protoc* **2**, 31-34,  
682 doi:10.1038/nprot.2007.13 (2007).

683

684

685 **Acknowledgments**

686 We thank Professor Jesse Bloom for his generous gift of the yeast SARS-CoV-2 RBD  
687 libraries. We thank Beijing BerryGenomics for the help on DNA sequencing. We thank  
688 Sino Biological Inc. for the technical assistance on mAbs and Omicron RBD  
689 expression. We thank Sartorius (Shanghai) Trading Co., Ltd. for providing instrumental  
690 help with BLI measurement. We thank Jia Luo and Hongxia Lv (National Center for  
691 Protein Sciences and core facilities at School of Life Sciences at Peking University) for  
692 the help in flow cytometry. This project is financially supported by the Ministry of  
693 Science and Technology of China (CPL-1233).

694

695 **Author contributions**

696 Y.C. and X.S.X designed the study. Y.C. and F.S coordinated the characterizations of  
697 the NAbs. J.W., F.J., H.L., H.S. performed and analyzed the yeast display mutation  
698 screening experiments. T.X., W.J., X.Y., P.W., H.L. performed the pseudovirus  
699 neutralization assays. W.H., Q.L., T.L., Y.Y., Q.C., S.L., Y.W. prepared the VSV-based  
700 SARS-CoV-2 pseudovirus. A.Y., Y.W., S.Y., R.A., W.S. performed and analyzed the  
701 antigen-specific single B cell VDJ sequencing. X.N., R.A. performed the antibody BLI  
702 studies. Z.C., S.D., P.L., L.W., Z.Z., X.W., J.X. performed the antibody structural  
703 analyses. P.W., Y.W., J.W, H.S, H.L. performed the ELISA experiments. X.H. and R.J.  
704 coordinated the blood samples of vaccinated SARS-CoV-1 convalescents. Y.C., X.W.,  
705 J.X., X.S.X wrote the manuscript with inputs from all authors.

706

707 **Declaration of interests**

708 X.S.X. and Y.C. are inventors on the patent application of DXP-604 and BD series  
709 antibodies. X.S.X. and Y.C. are founders of Singlomics Biopharmaceuticals Inc. Other  
710 authors declare no competing interests.

711

### 712 **Corresponding authors**

713 Correspondence to Yunlong Cao or Xiangxi Wang or Junyu Xiao or Youchun Wang or  
714 Xiaoliang Sunney Xie. Request for materials described in this study should be directed  
715 to Xiaoliang Sunney Xie.

716

### 717 **Data availability**

718 Data availability Processed escape maps for NAbs are available in Supplementary Data  
719 1 (as figures), or at <https://github.com/sunneyxielab/SARS-CoV-2-RBD-Abs-HTDMS>  
720 (as mutation escape score data). Raw Illumina and PacBio sequencing data are available  
721 on NCBI Sequence Read Archive BioProject PRJNA787091. We used  
722 vdj\_GRCh38\_alts\_ensembl-5.0.0 as the reference of V(D)J alignment, which can be  
723 obtained from

724 <https://support.10xgenomics.com/single-cell-vdj/software/downloads/latest>.

725 IMGT/DomainGapAlign is based on the built-in latest IMGT antibody database, and  
726 we let the "Species" parameter as "Homo sapiens" while kept the others as default.  
727 FACS-based deep mutational scanning datasets could be downloaded from  
728 [https://media.githubusercontent.com/media/jbloomlab/SARS2\\_RBD\\_Ab\\_escape\\_map](https://media.githubusercontent.com/media/jbloomlab/SARS2_RBD_Ab_escape_map/main/processed_data/escape_data.csv)  
729 [s/main/processed\\_data/escape\\_data.csv](https://media.githubusercontent.com/media/jbloomlab/SARS2_RBD_Ab_escape_map/main/processed_data/escape_data.csv).

730 Processed data of this study has been added to this repository as well.

731

### 732 **Code availability**

733 Scripts for analyzing SARS-CoV-2 escaping mutation profile data and for reproducing  
734 figures in this paper are available at [https://github.com/sunneyxielab/SARS-CoV-2-](https://github.com/sunneyxielab/SARS-CoV-2-RBD-Abs-HTDMS)  
735 [RBD-Abs-HTDMS](https://github.com/sunneyxielab/SARS-CoV-2-RBD-Abs-HTDMS).

736

### 737 **Extended Data Fig. 1: Illustration of SARS-CoV-2 spike with Omicron's** 738 **mutations.**

739 **a**, SARS-CoV-2 D614G spike protein structure overlaid with Omicron mutations.  
740 Omicron's (BA.1) popular mutations are marked by red (for substitutions), blue (for  
741 insertions) and gray balls (for deletions). **b**, NTD-binding NAbs shown together in

742 complex with NTD. Substitutions and deletions of Omicron NTD are colored blue and  
743 red, respectively.

744

745 **Extended Data Fig. 2: Comparison between FACS and MACS-based deep**  
746 **mutational scanning.**

747 Deep mutational scanning maps with MACS-based (left) and FACS-based assays  
748 (right) of seven therapeutic neutralizing antibodies that have received emergency use  
749 authorization. Sites mutated in the Omicron variant are highlighted. Mutation amino  
750 acids of each site are shown by single letters. The heights represent mutation escape  
751 score, and colors represent chemical properties. FACS-based data were obtained from  
752 public datasets by Jesse Bloom.

753

754 **Extended Data Fig. 3: Omicron neutralization IC<sub>50</sub> fold-change distribution of**  
755 **247 NAbs of diverse epitopes.**

756 Fold-change of IC<sub>50</sub> (VSV pseudovirus neutralization) compared to D614G by Beta  
757 and Omicron (BA.1) are shown for all 247 NAbs tested. The impact of each RBD  
758 mutation of Omicron on NAbs' binding is inferred from yeast display mutation  
759 screening. Each NAb's binding to Omicron RBD was validated through ELISA. All  
760 neutralization and ELISA assays were conducted in biological duplicates.

761

762 **Extended Data Fig. 4: Heavy chain V/J segment recombination of NAbs of each**  
763 **epitope group.**

764 **a-f**, Chord diagrams showing the heavy chain V segment and J segment recombination  
765 of epitope group A(a), B(b), C(c), D(d), E(e) and F(f). The width of the arc linking a V  
766 segment to a J segment indicates the antibody number of the corresponding  
767 recombination. The inner layer scatter plots show the V segment amino acid mutation  
768 rate, while black strips show the 25%~75% quantile of mutation rates.

769

770 **Extended Data Fig. 5. Neutralization potency, heavy chain CDR3 length, and**  
771 **mutation rate distribution for NAbs of each epitope group.**

772 **a**, The length of H chain complementarity-determining region 3 (HCDR3) amino acid  
773 sequence for NAbs in each epitope group (n=66, 26, 57, 27, 39, 32 antibodies for  
774 epitope group A, B, C, D, E, F, respectively). HCDR3 lengths are displayed as mean ±  
775 s.d. **b**, The V segment amino acid mutation rate for NAbs in each epitope group (n=66,

776 26, 57, 27, 39, 32 antibodies for epitope group A, B, C, D, E, F, respectively). Mutation  
777 rates are calculated and displayed as mean  $\pm$  s.d. **c-e**, The IC<sub>50</sub> against D614G(c),  
778 Beta(d), and Omicron(e) variants for NABs in each epitope group (n=66, 26, 57, 27, 39,  
779 32 antibodies for epitope group A, B, C, D, E, F, respectively). IC<sub>50</sub> values are  
780 displayed as mean  $\pm$  s.d. in the log<sub>10</sub> scale. Pseudovirus assays for each variant are  
781 biologically replicated twice. Dotted lines show the detection limit, which is from  
782 0.0005  $\mu$ g/mL to 10  $\mu$ g/mL. IC<sub>50</sub> geometric means are also labeled on the figure.

783

784 **Extended Data Fig. 6: Escape hotspots of different epitope groups on the RBD**  
785 **surface.**

786 **a-f**, Aggregated site escape scores of antibodies for epitope group A-F, respectively.  
787 Epitope groups are distinguished by distinct colors, and the shades show normalized  
788 site escape scores. Escape hotspots of each epitope group are annotated by arrows.

789

790 **Extended Data Fig. 7: Antibody-RBD interface distribution for NABs of each**  
791 **epitope group.**

792 **a-f**, Aggregated antibody-antigen interface of antibodies for epitope group A-F,  
793 respectively. Antibody-antigen interface was indicated from publicly available  
794 structures of neutralizing antibodies in complex with SARS-CoV-2 RBD. Different  
795 colors distinguish epitope groups, and the shade reflects group-specific site popularity  
796 to appear on the complex interface. Shared interface residues (Omicron) of each group  
797 are annotated.

798

799 **Extended Data Fig. 8: Comparison between mutation escape scores estimated**  
800 **from yeast display and neutralization of variants carrying corresponding**  
801 **mutations.**

802 **a**, K417N escape scores and corresponding K417N pseudovirus neutralizing IC<sub>50</sub> fold  
803 change compared to D614G pseudovirus of antibodies within epitope group A. **b**,  
804 E484K/E484A escape scores and corresponding E484K pseudovirus neutralizing IC<sub>50</sub>  
805 fold change compared to D614G pseudovirus of antibodies within epitope group C.

806

807 **Extended Data Fig. 9: Pseudovirus neutralization of NAb drugs against SARS-**  
808 **CoV-2 variants of concern.**

809 Pseudovirus (VSV-based) assays were performed using Huh-7 cells. Data are collected

810 from three biological replicates and represented as mean±s.d.

811

812 **Extended Data Fig. 10: BLI response between NAb drugs and the RBD of SARS-**  
813 **CoV-2 wildtype, Beta, or Omicron strain.**

814 Antibodies were captured by Protein A sensor. The concentrations of RBD are shown  
815 in different colors. Dissociation constant ( $K_D$ ), association constant ( $k_a$ ), and  
816 dissociation rate constant ( $k_d$ ) are labeled. NAbs without binding are marked as  
817 “Escaped”.

818

819



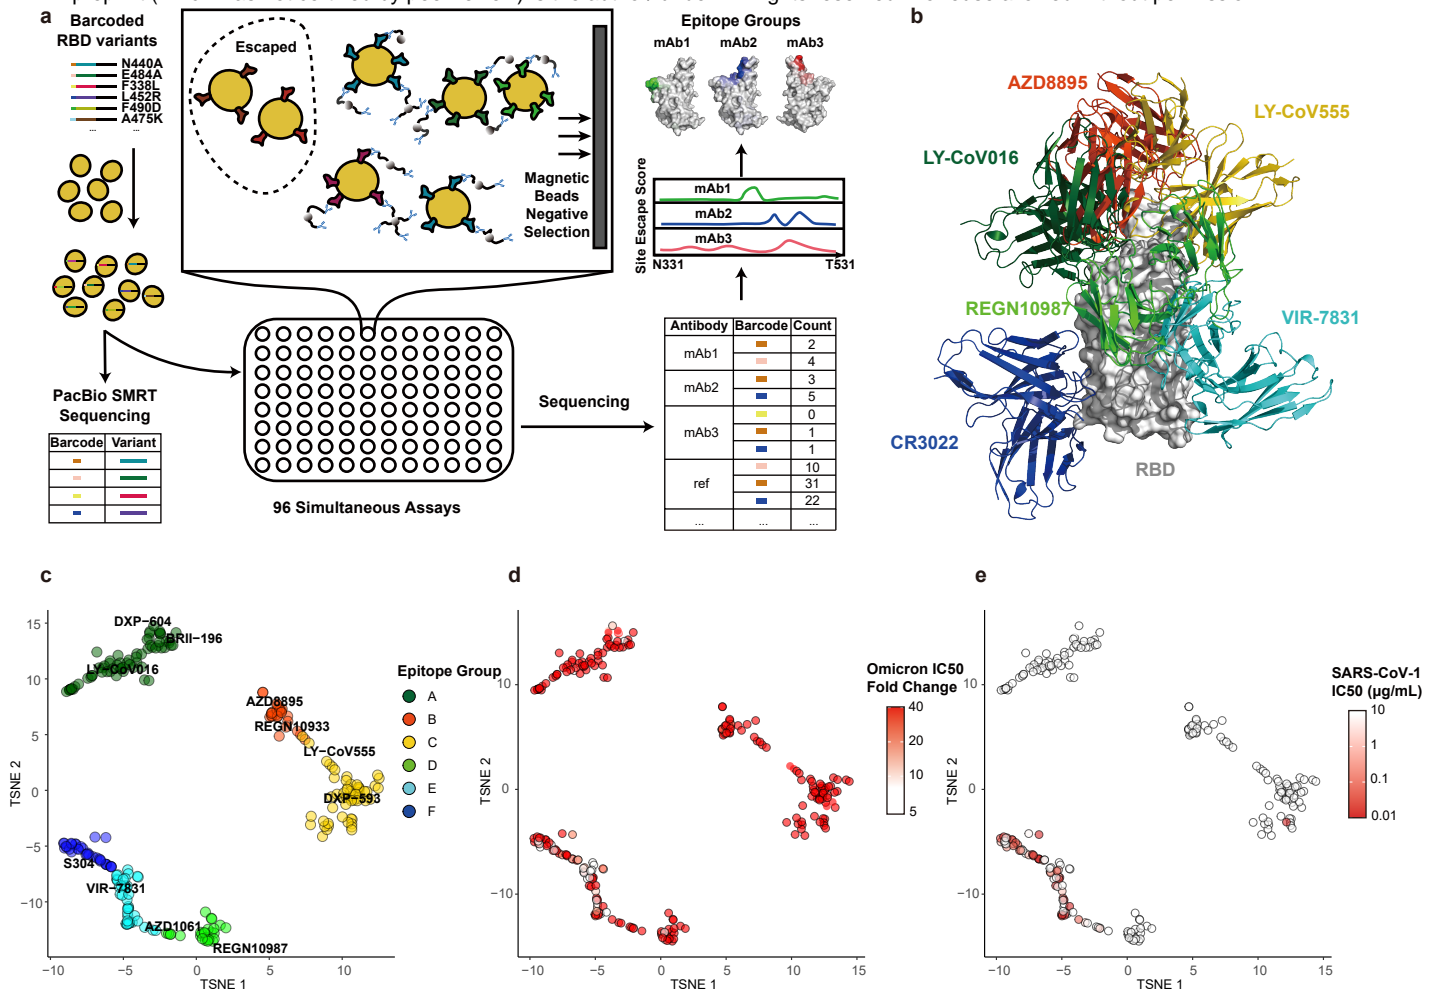

Figure 1



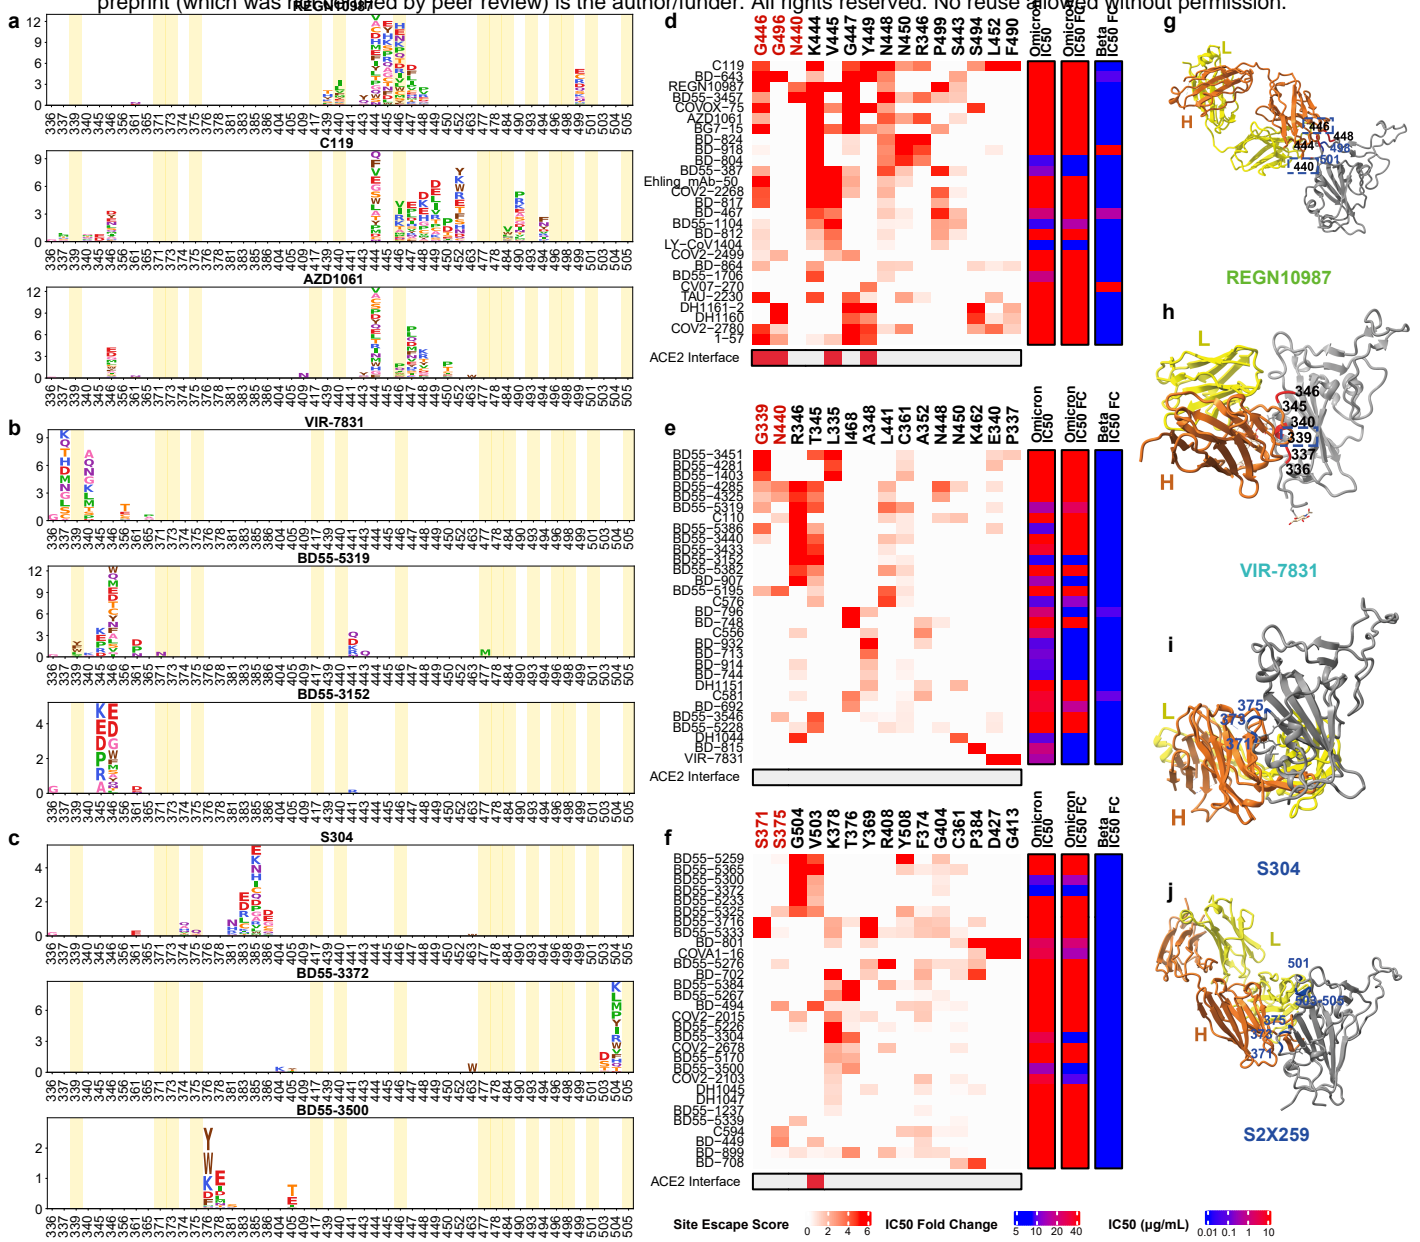

**Figure 3**

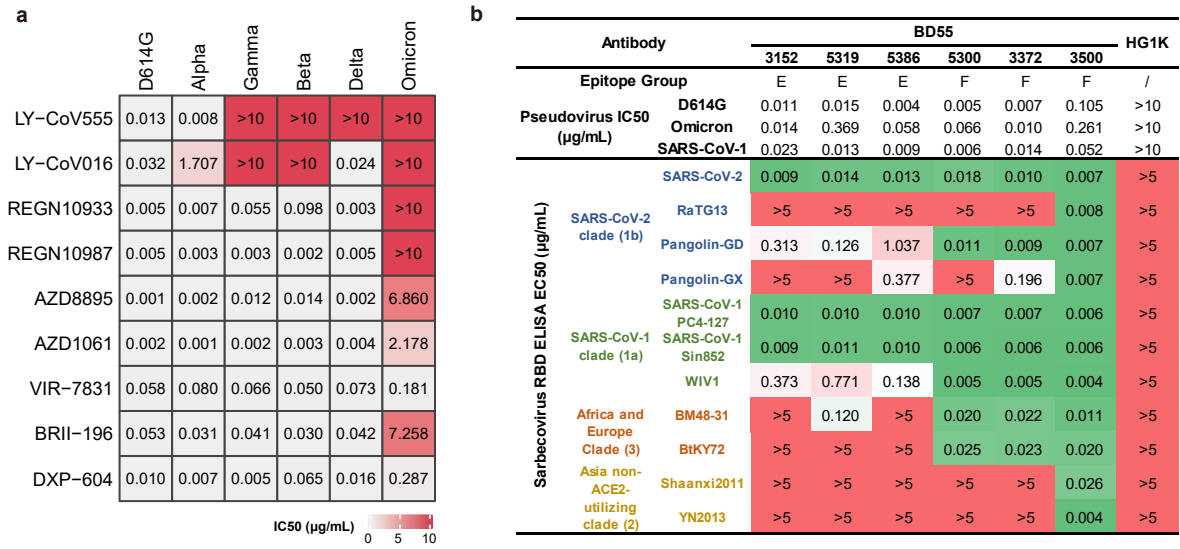

Figure 4

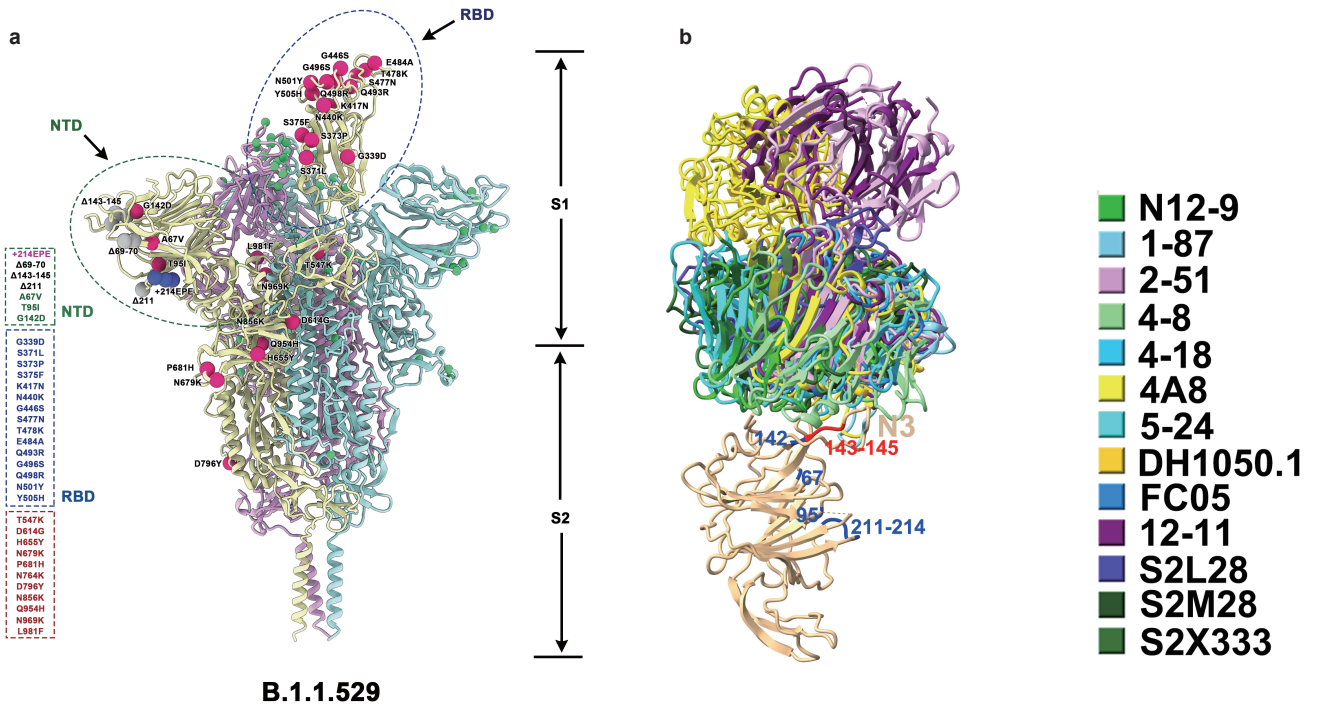

Extended Data Figure 1

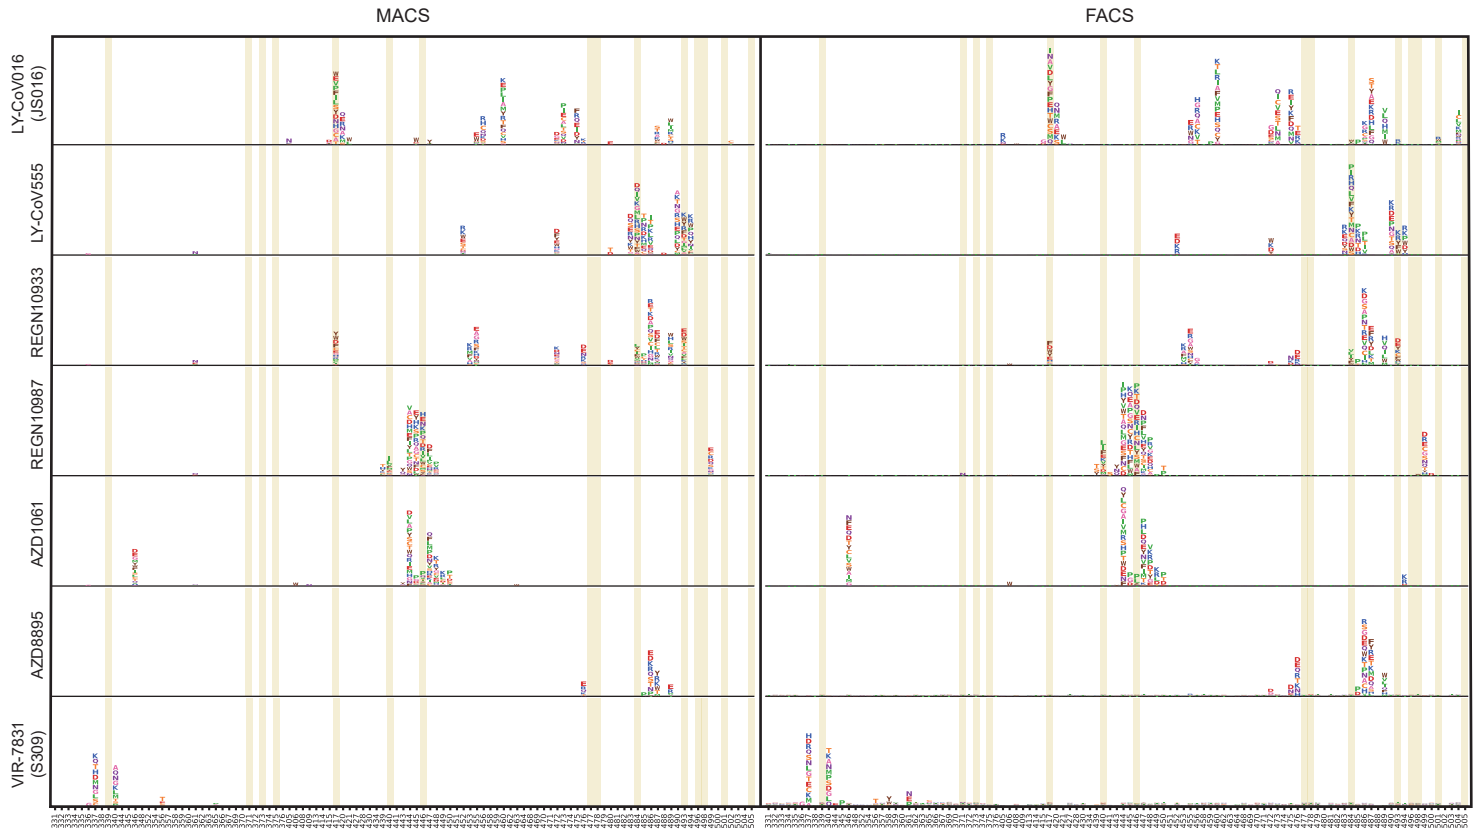

Extended Data Figure 2



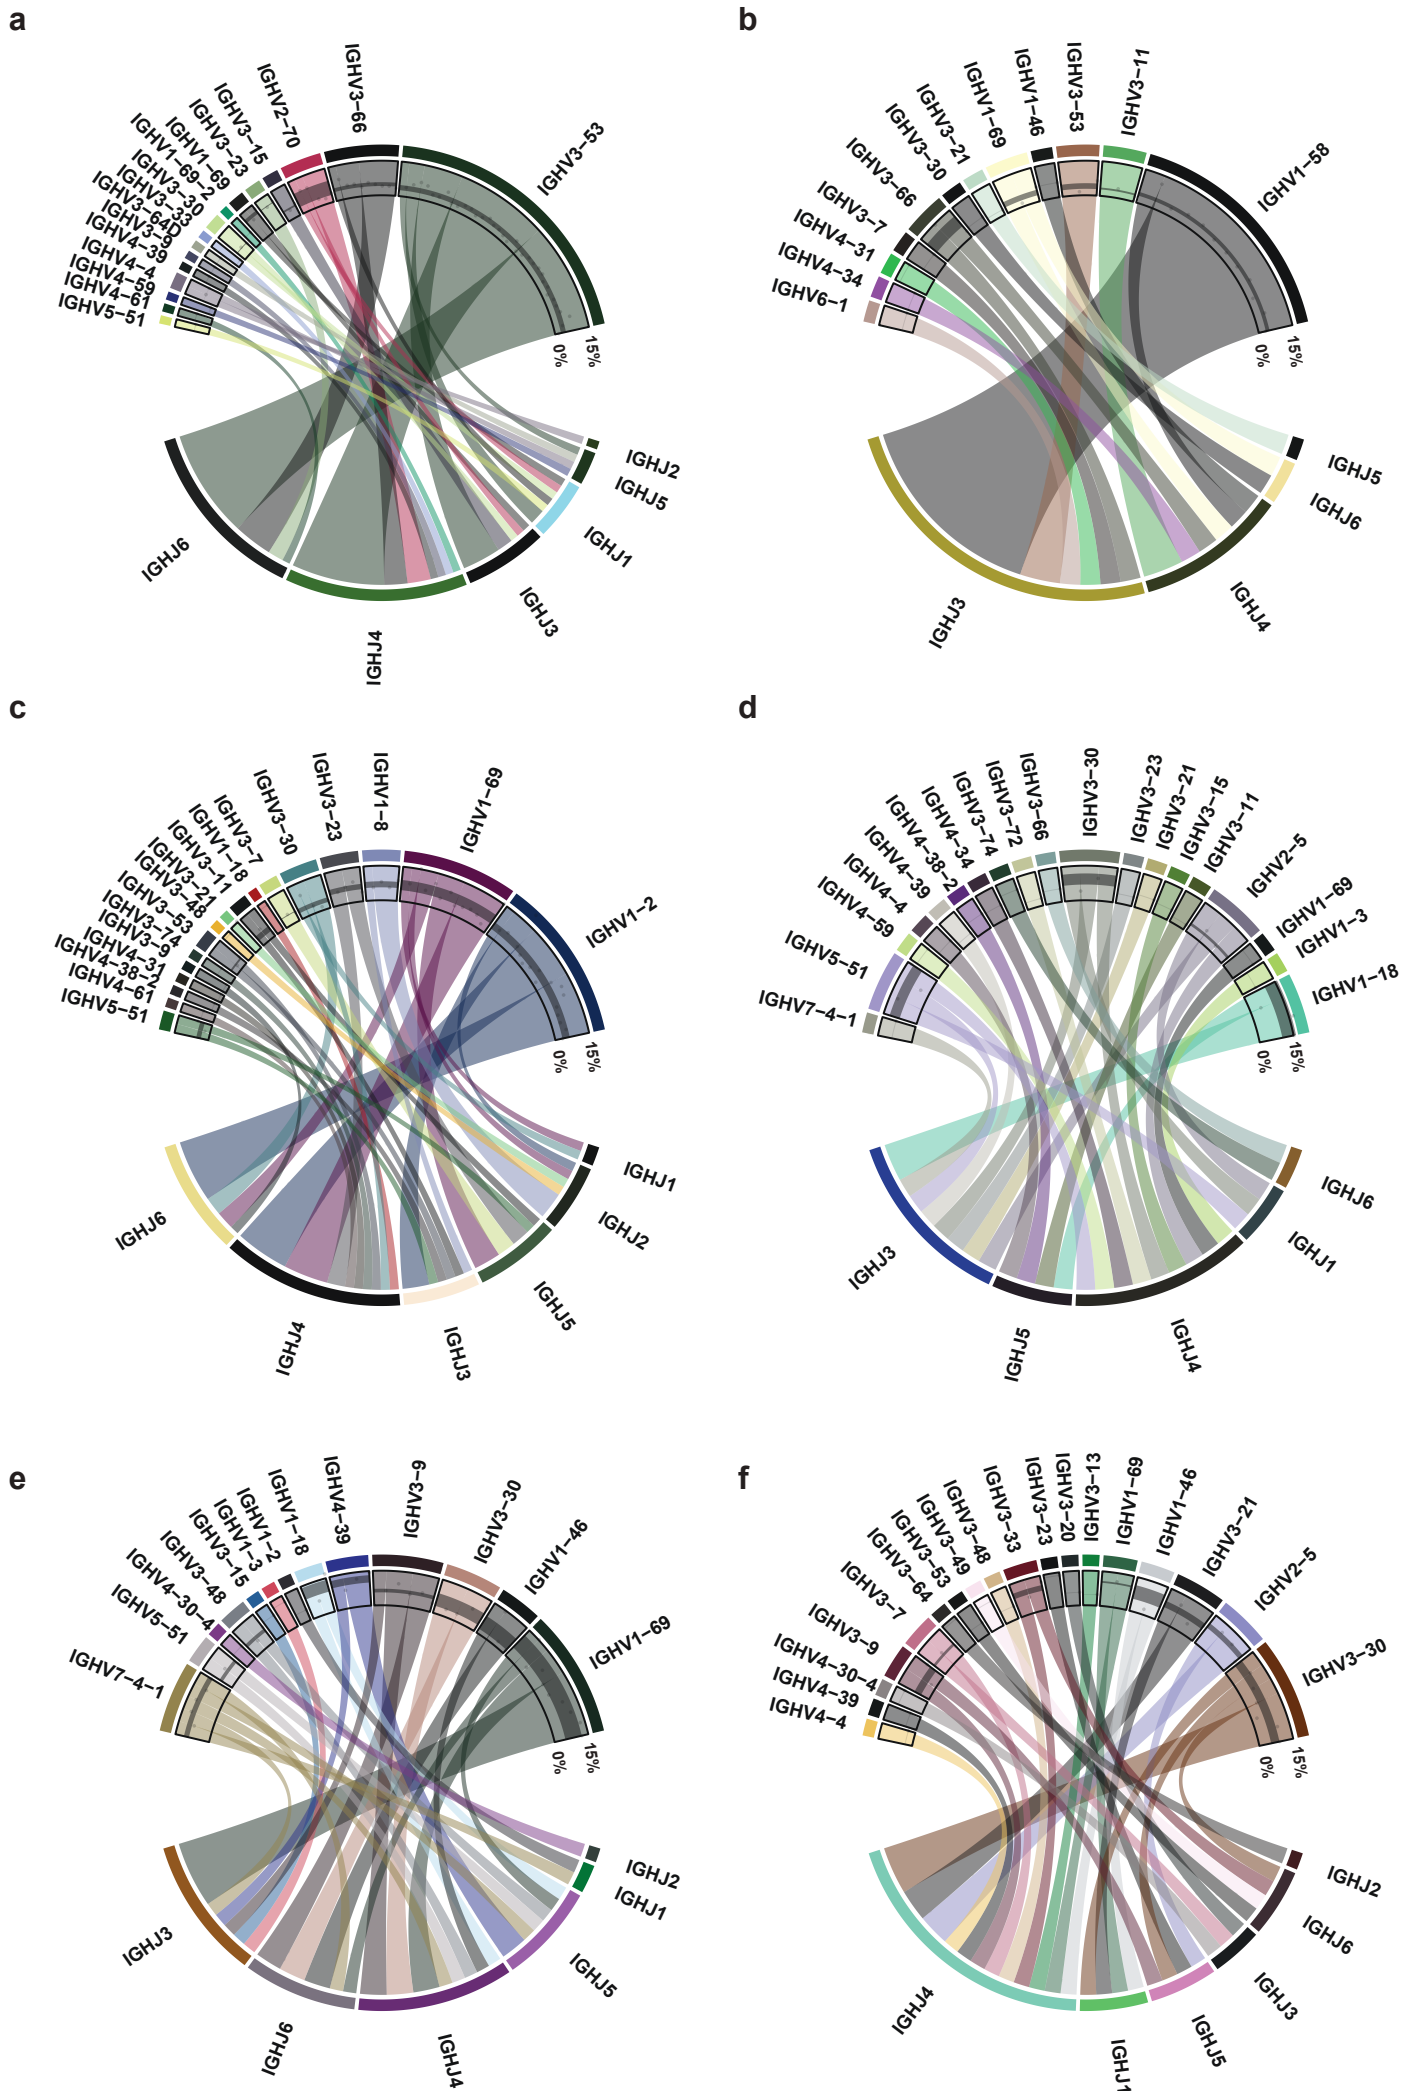

Extended Data Figure 4



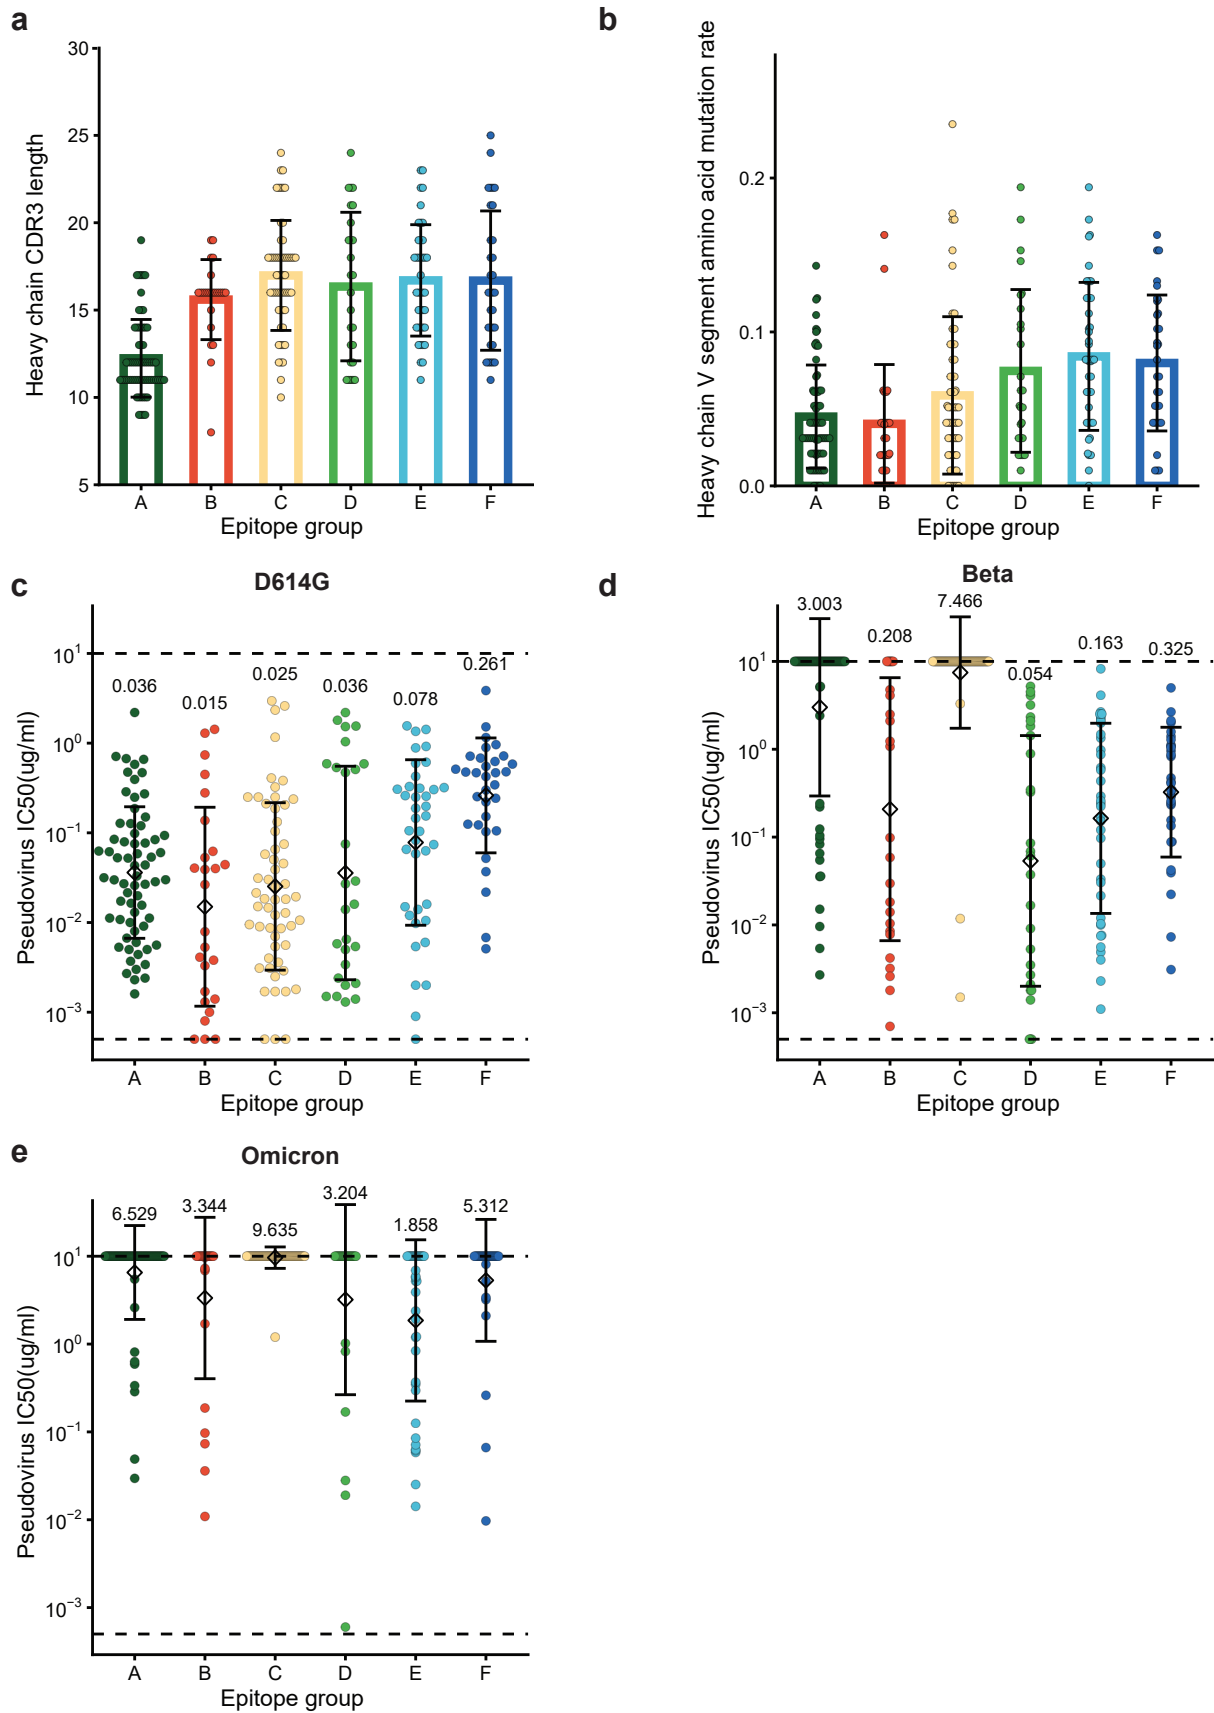

Extended Data Figure 5

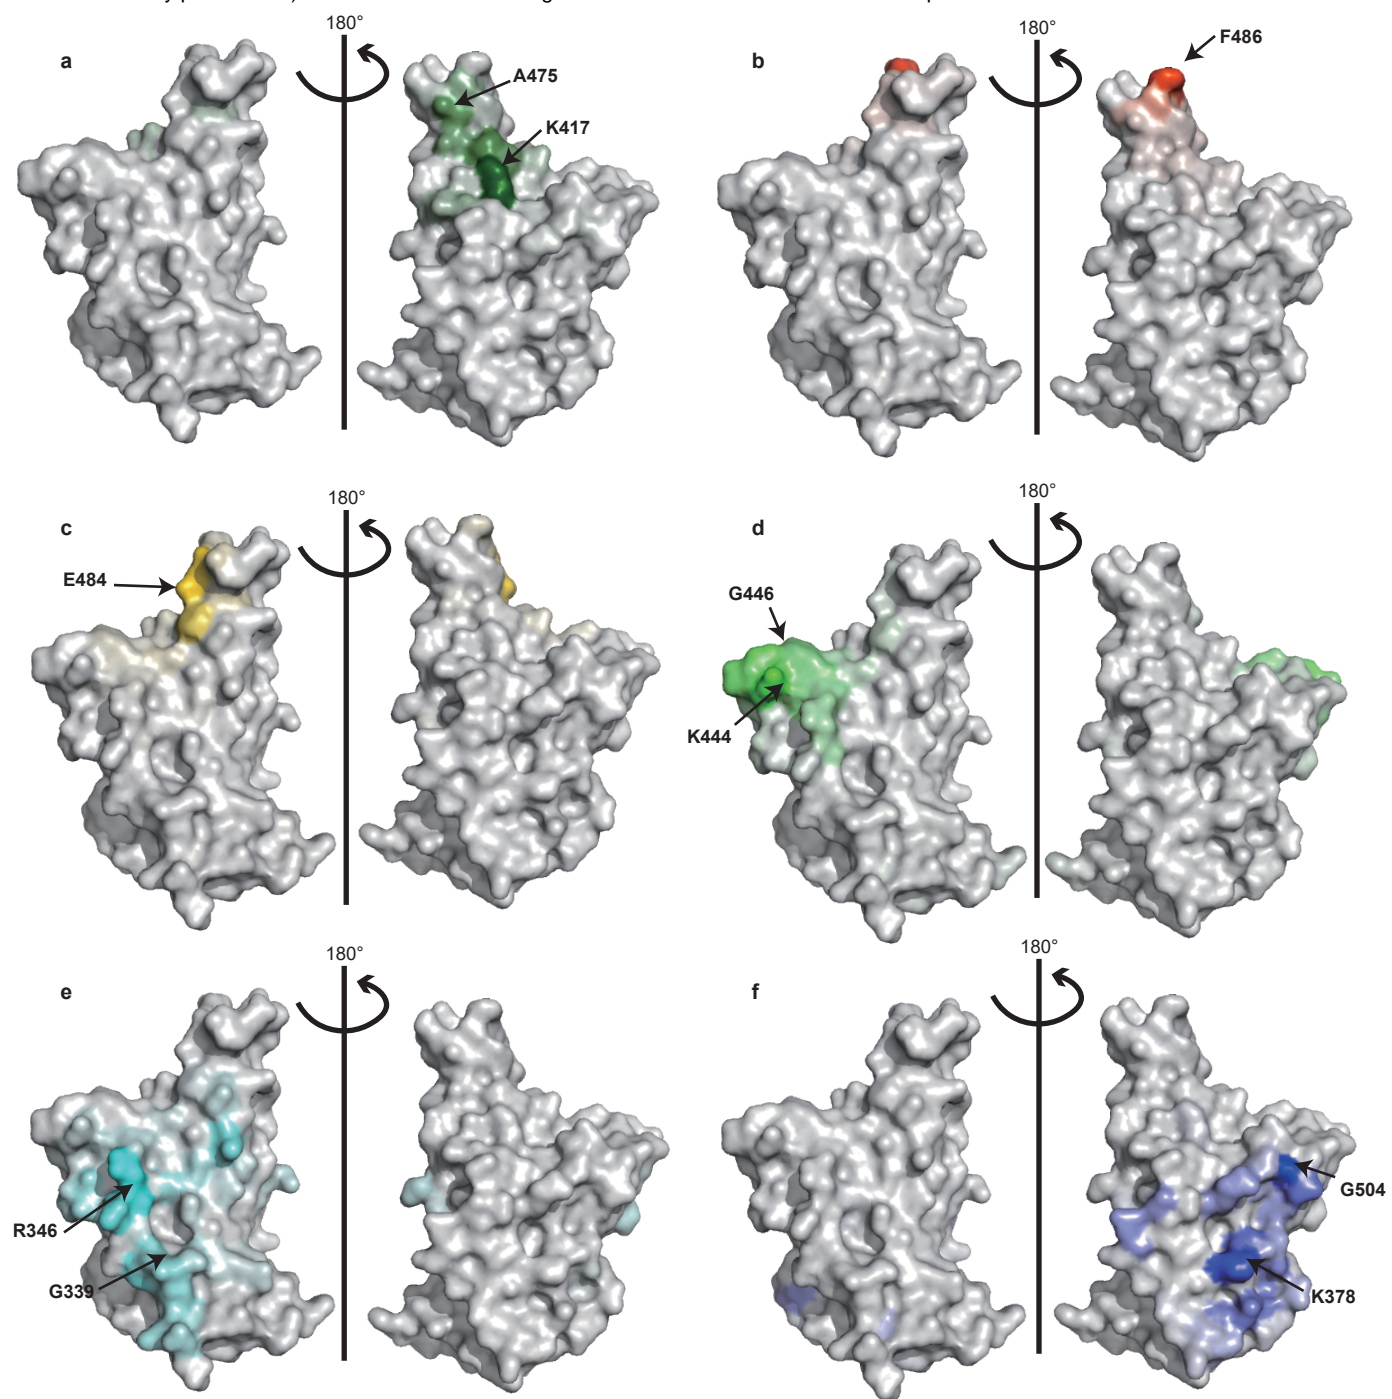

Extended Data Figure 6

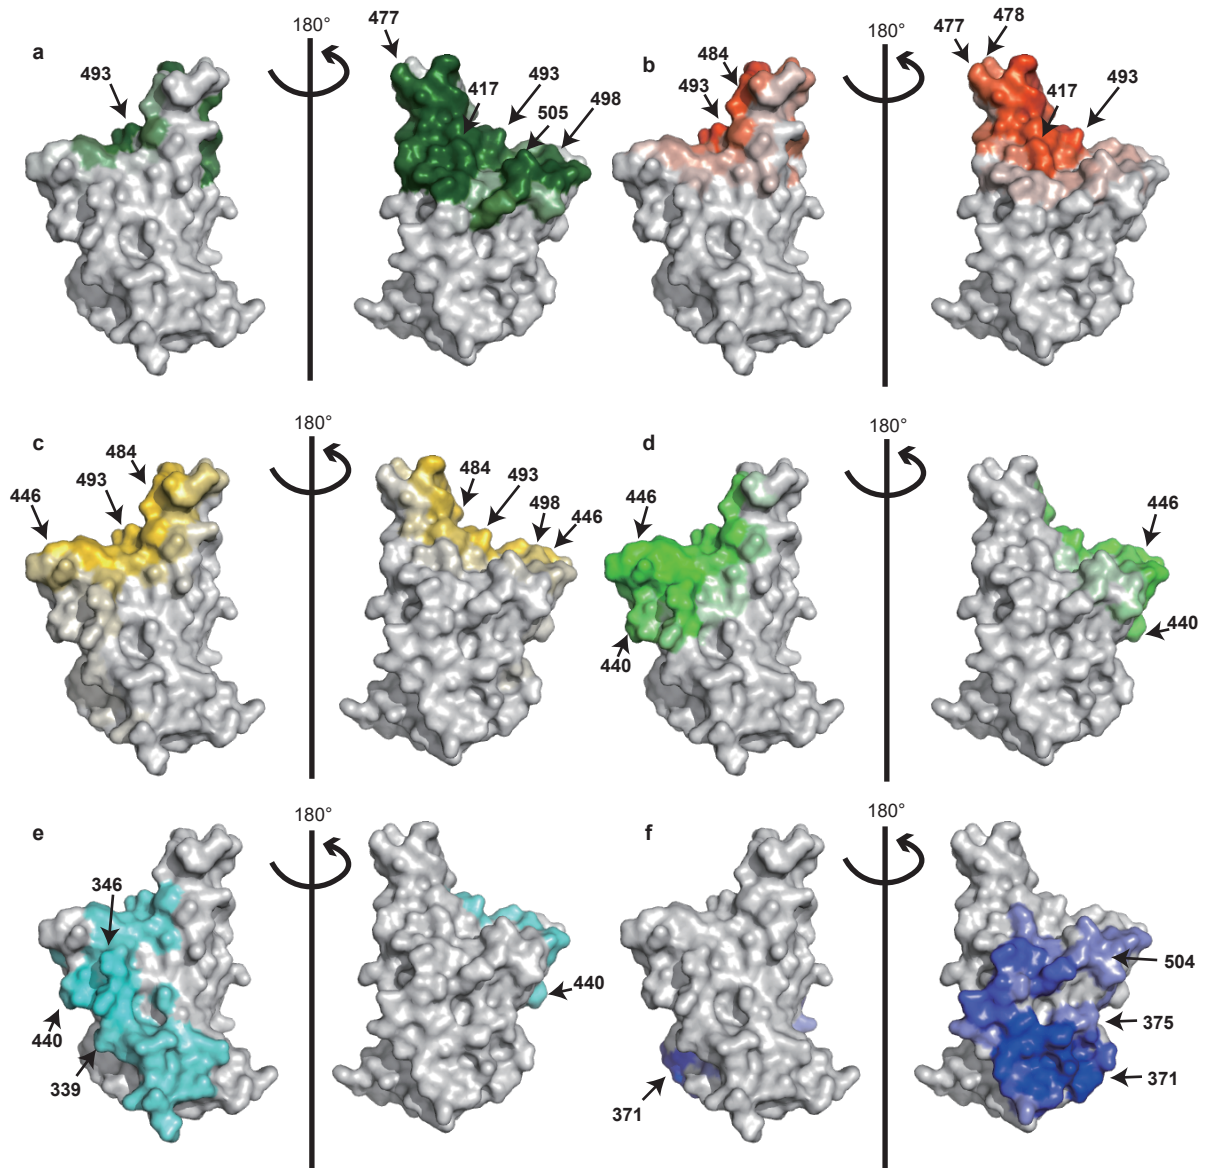

Extended Data Figure 7

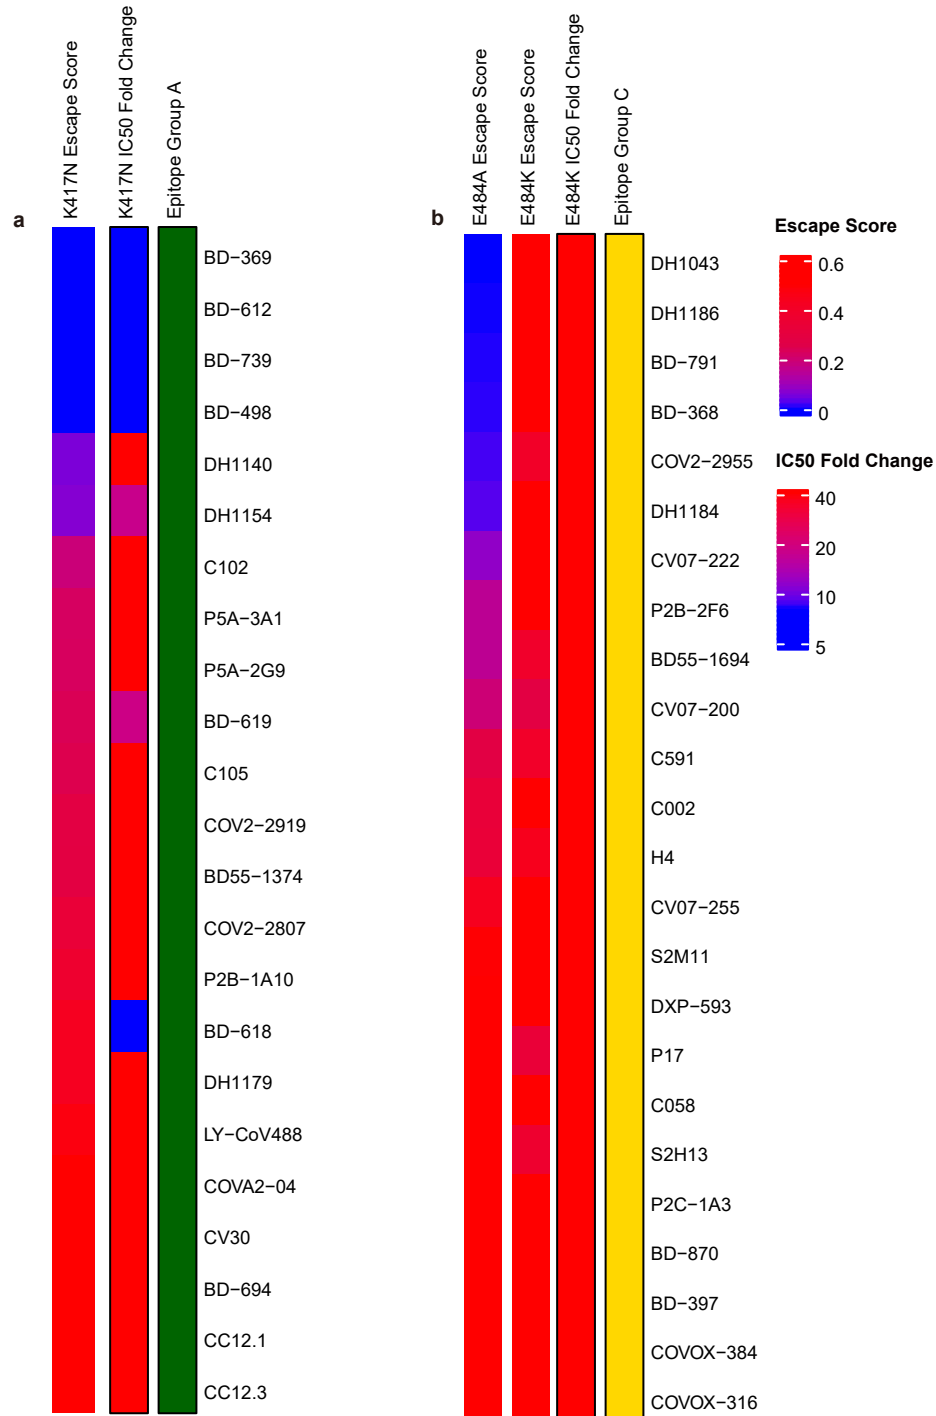

Extended Data Figure 8

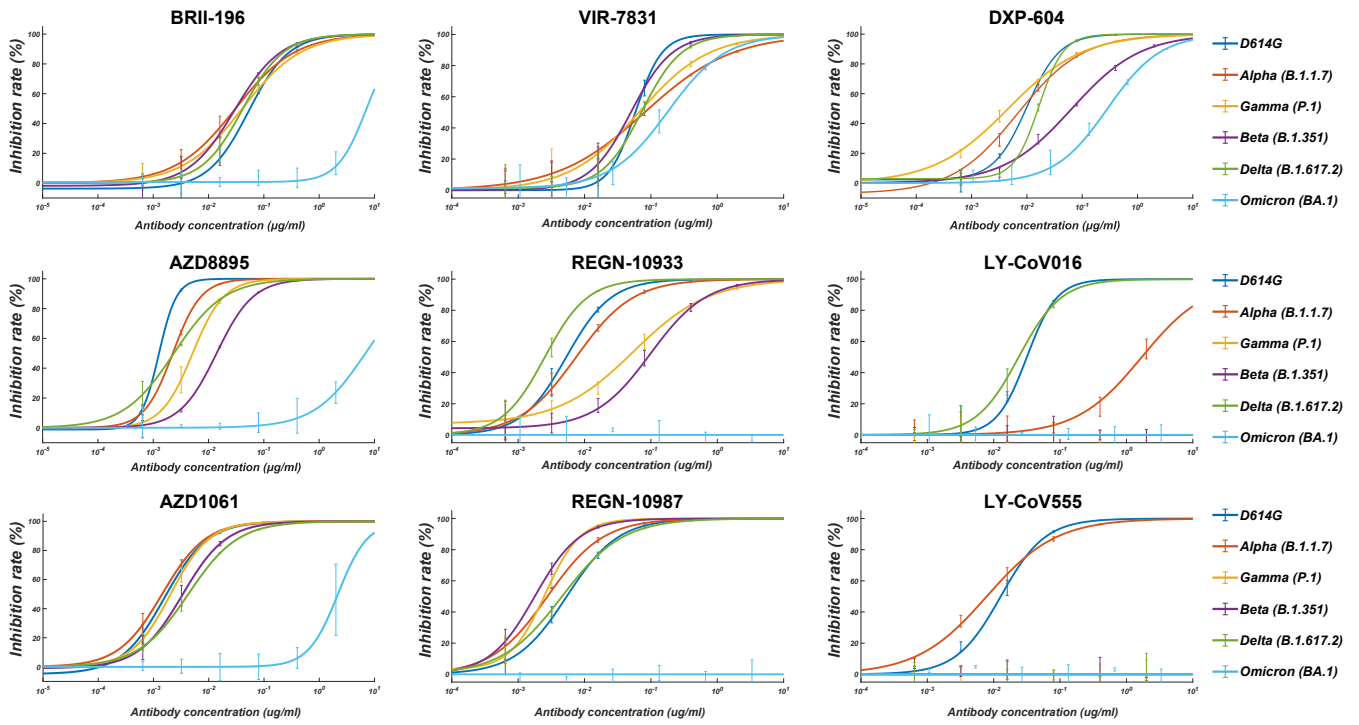

Extended Data Figure 9

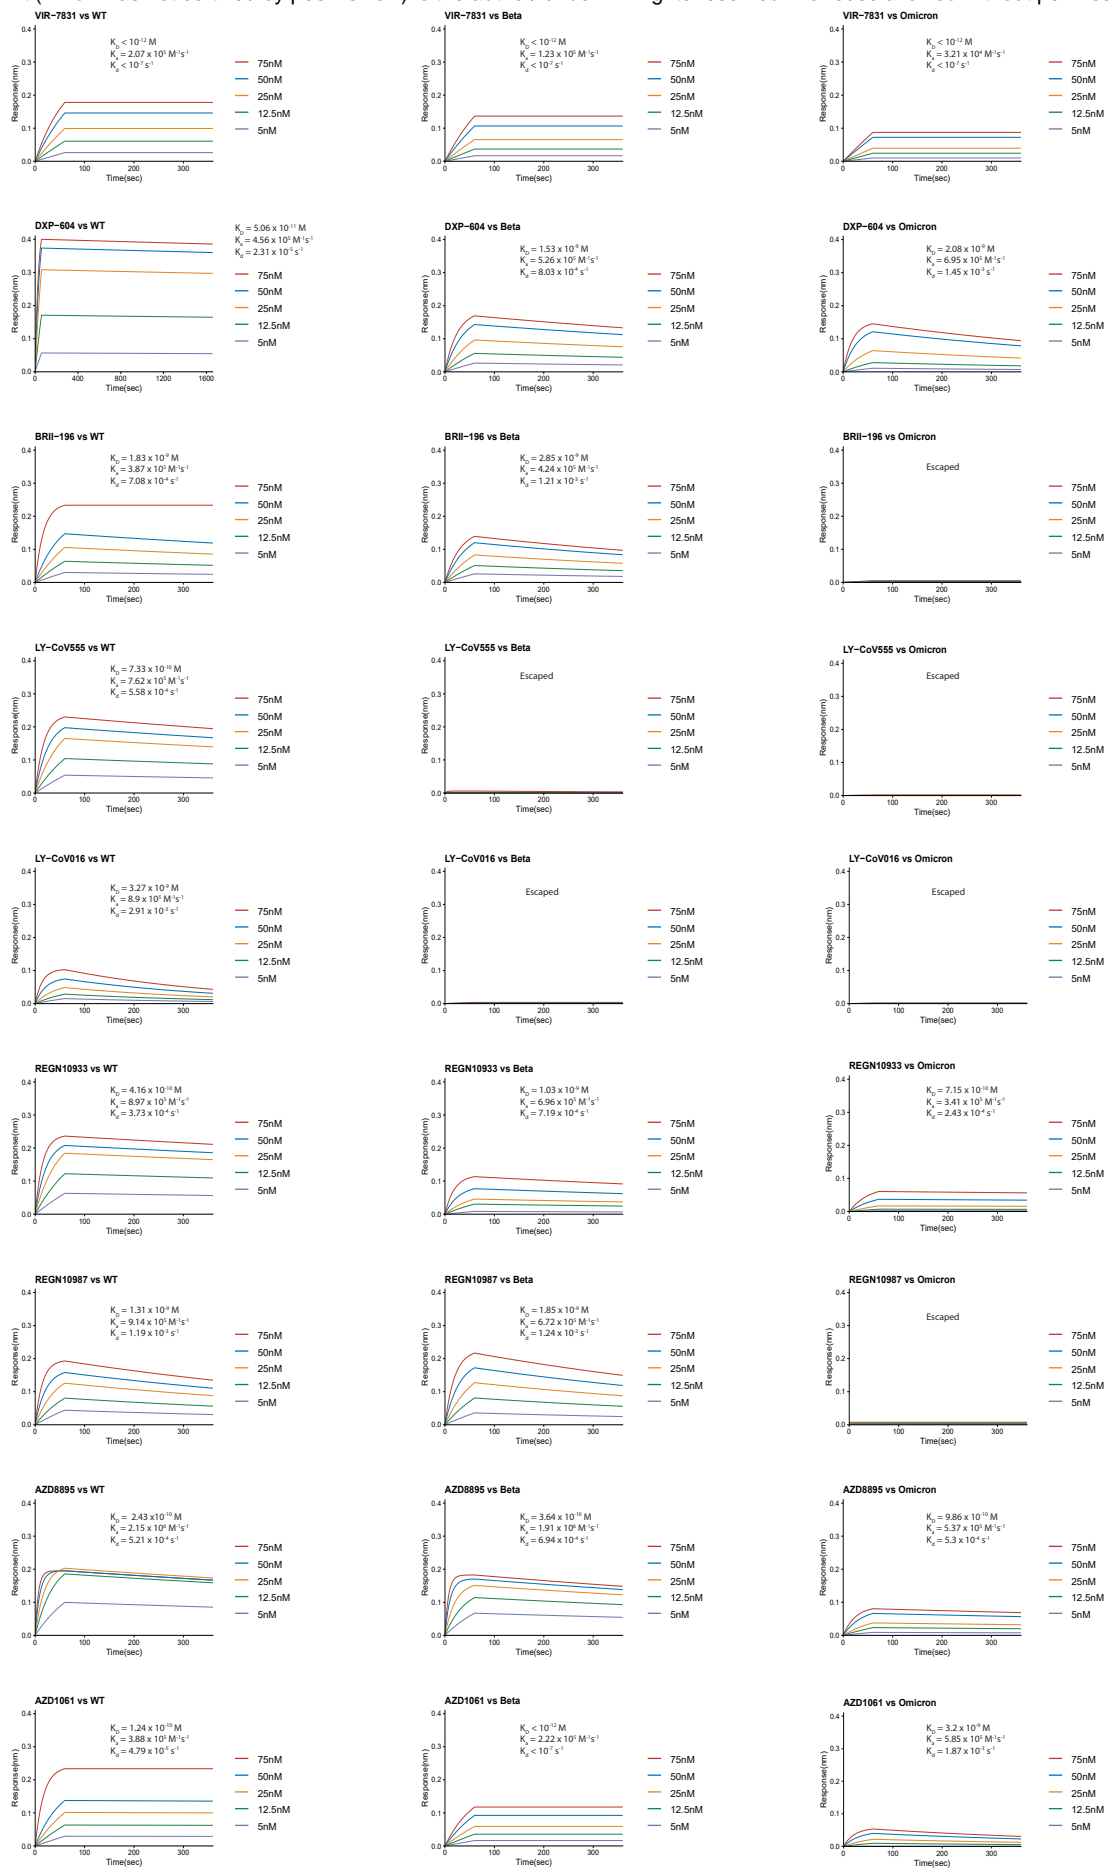

Extended Data Figure 10
