# Supplementary material for: Omicron escapes the majority of existing SARS-CoV-2 neutralizing antibodies
Source: bioRxiv preprint, doi:10.1101/2021.12.07.470392, version 2 (2021-12-22)
Supplement: Supplementary Data 1 [file 470392_file02.pdf]

### Escape maps of Epitope Group A antibodies

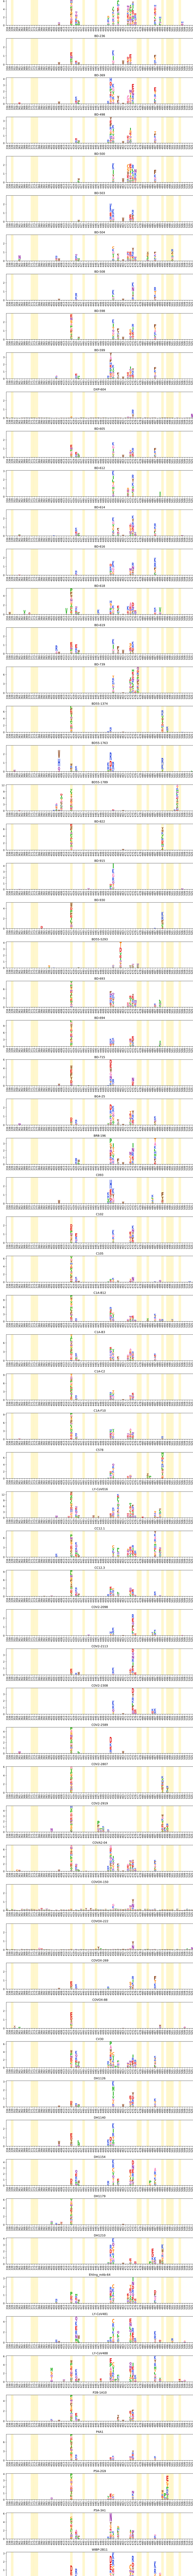

# Escape maps of Epitope Group B antibodies

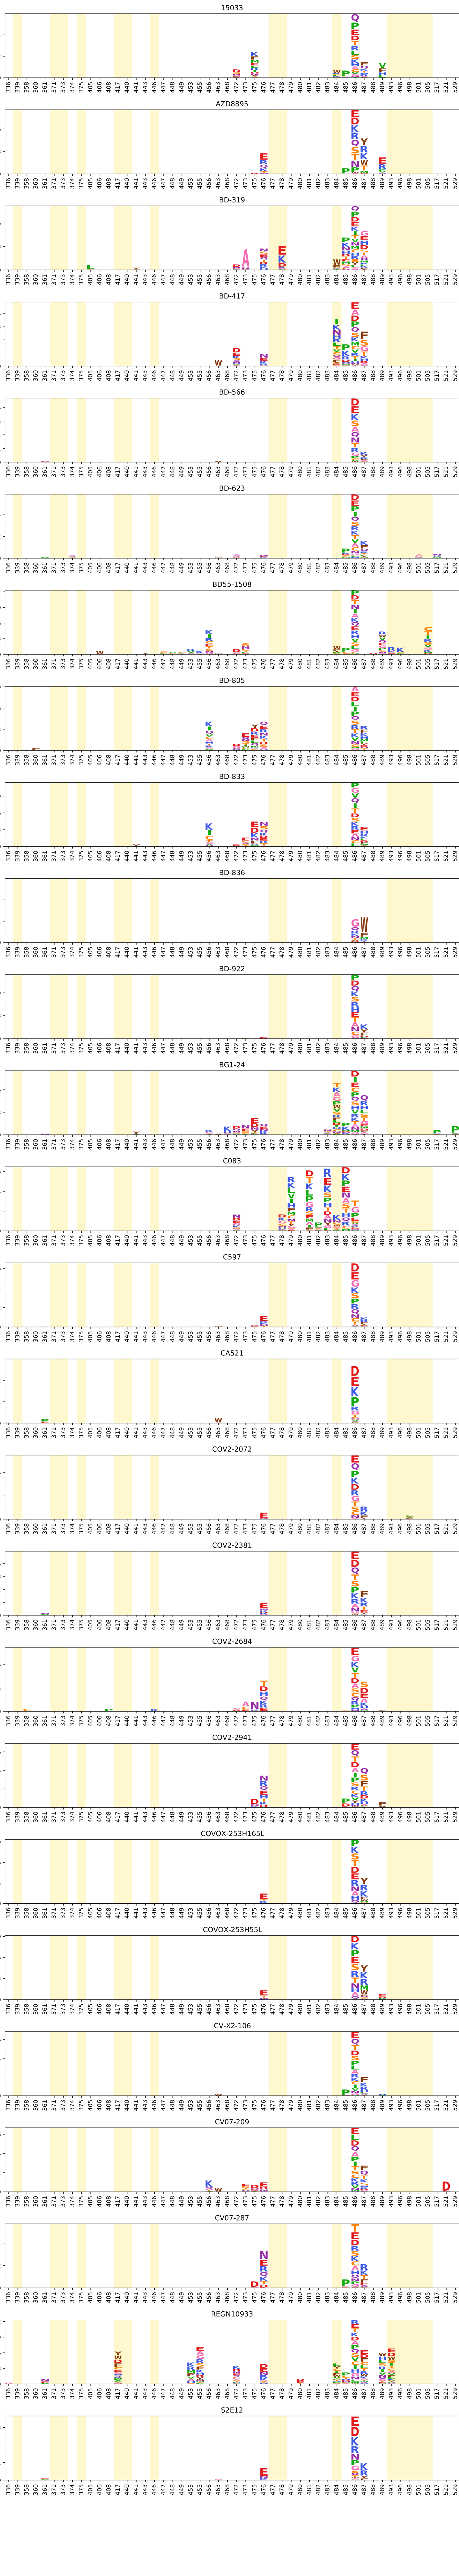

# Escape maps of Epitope Group C antibodies

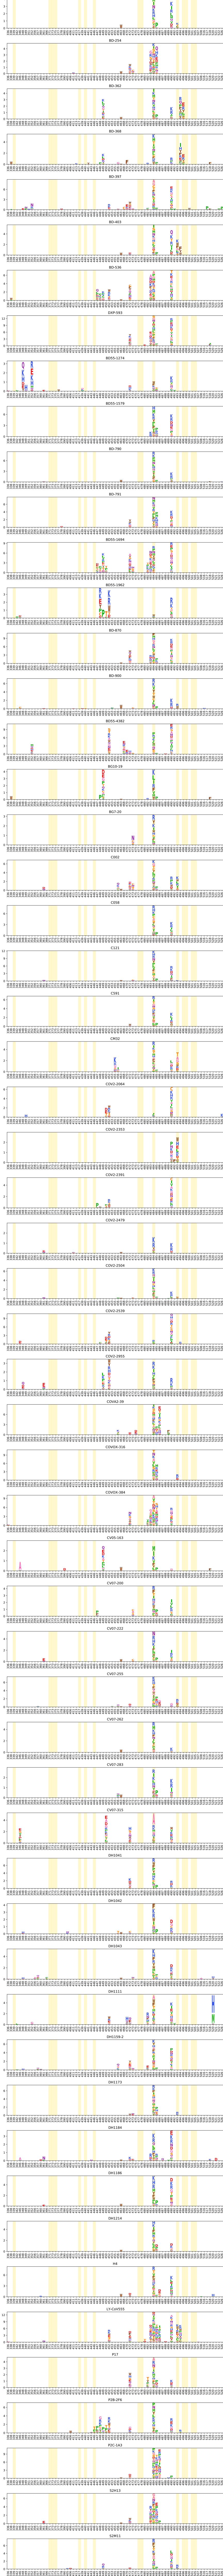

# Escape maps of Epitope Group D antibodies

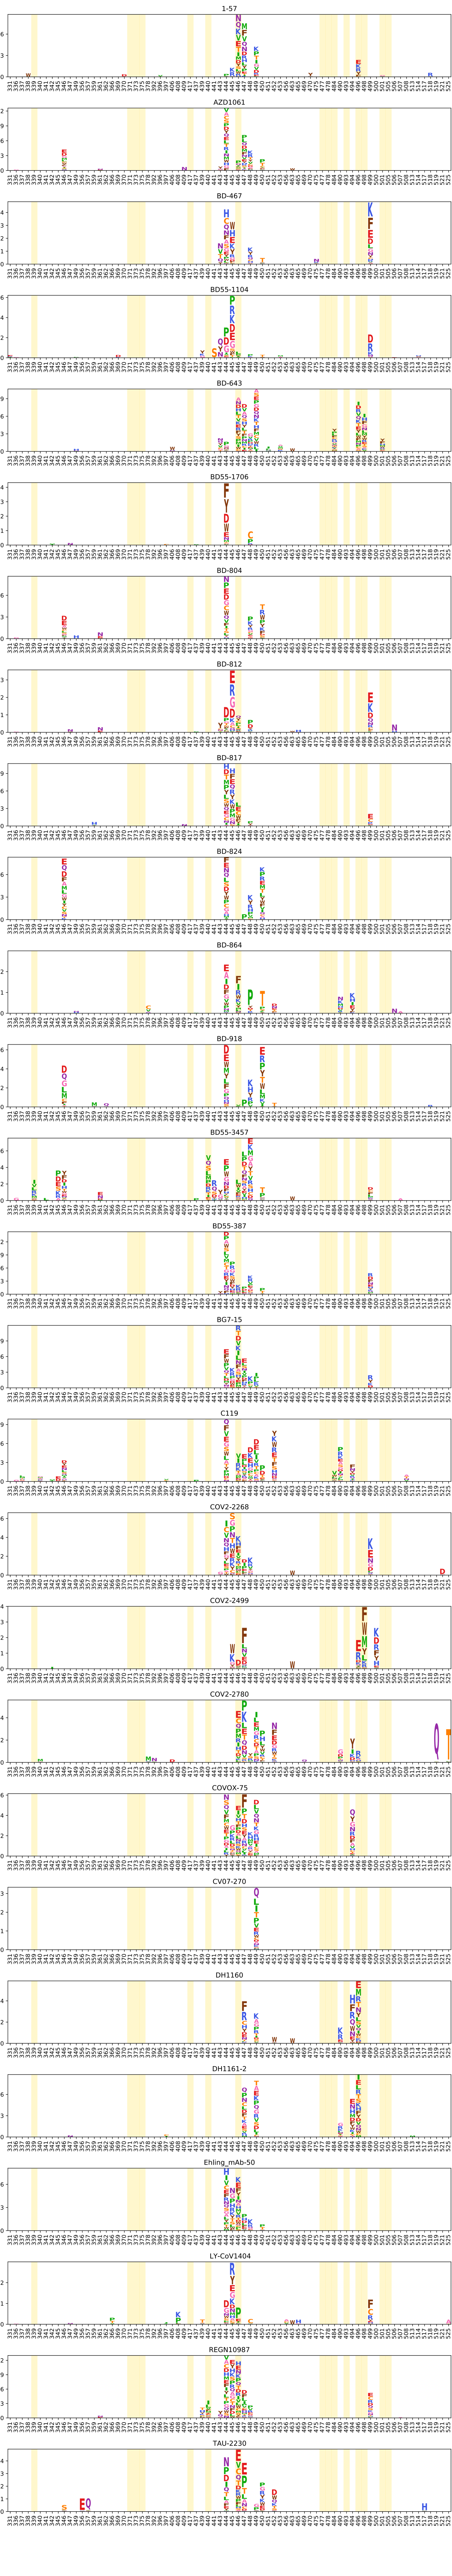

# Escape maps of Epitope Group E antibodies

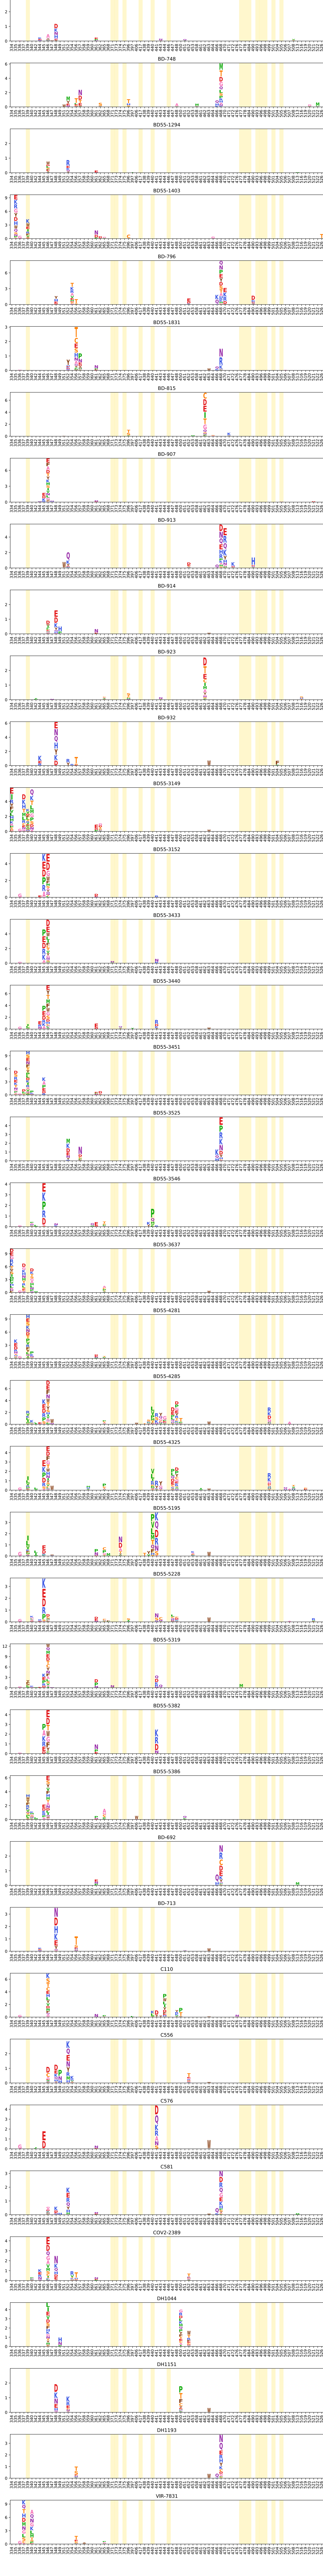

# Escape maps of Epitope Group F antibodies

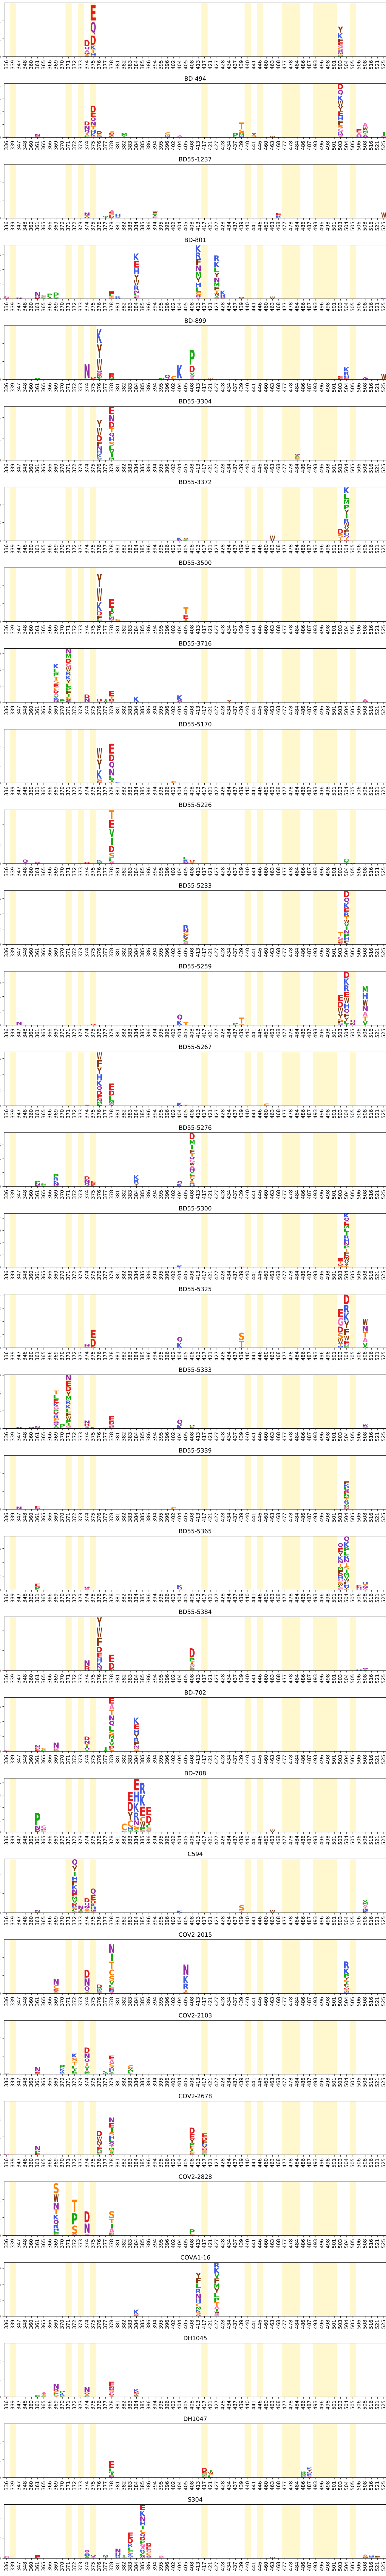

**Supplementary Data 1** Escape maps of 247 SARS-CoV-2 RBD antibodies of 6 epitope groups. Page 1-6 correspond to antibodies of epitope group A-F, respectively. For each site, the height of each amino acid residue represents its mutation escape score. Sites mutated frequently in Omicron variant are highlighted. Residues are colored according to their functional escape group (*dmslogo\_funcgroup* option of *logomaker* Python package).
