# Supplementary material for: Omicron escapes the majority of existing SARS-CoV-2 neutralizing antibodies
Source: bioRxiv preprint, doi:10.1101/2021.12.07.470392, version 2 (2021-12-22)
Supplement: Supplementary Data 2 [file 470392_file03.pdf]

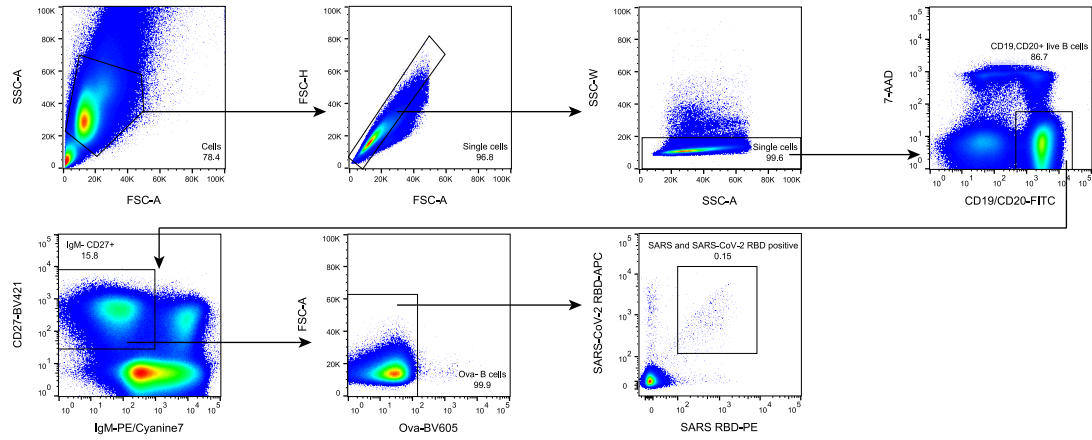

**Supplementary Data 2** Flow cytometry gating scheme for antigen-specific memory B cell sorting. Gating was on singlets that were 7-AAD<sup>-</sup>;CD19<sup>+</sup> or CD20<sup>+</sup>, IgM<sup>+</sup>, CD27<sup>+</sup>, and Ova<sup>+</sup>. Sorted cells were SARS RBD<sup>+</sup> and SARS-CoV-2 RBD<sup>+</sup>.
